# Supplementary material for: Different DNA methylome, transcriptome and histological features in uterine fibroids with and without MED12 mutations
Source: PubMed Central journal article supplement (PMC9135739; doi:10.1038/s41598-022-12899-7), 2022-05-26
Supplement: 41598_2022_12899_MOESM3_ESM.pdf [file 41598_2022_12899_MOESM3_ESM.pdf]

**Different DNA methylome, transcriptome and histological features in uterine fibroids with and without MED12 mutations**

Ryo Maekawa\*, Department of Obstetrics and Gynecology, Yamaguchi University Graduate School of Medicine, Ube, 755-8505 Japan

Shun Sato, Department of Obstetrics and Gynecology, Yamaguchi University Graduate School of Medicine, Ube, 755-8505 Japan

Tetsuro Tamehisa, Department of Obstetrics and Gynecology, Yamaguchi University Graduate School of Medicine, Ube, 755-8505 Japan

Takahiro Sakai, Department of Obstetrics and Gynecology, Yamaguchi University Graduate School of Medicine, Ube, 755-8505 Japan

Takuya Kajimura, Department of Obstetrics and Gynecology, Yamaguchi University Graduate School of Medicine, Ube, 755-8505 Japan

Kotaro Sueoka, Department of Obstetrics and Gynecology, Yamaguchi University Graduate School of Medicine, Ube, 755-8505 Japan

Norihiro Sugino, Department of Obstetrics and Gynecology, Yamaguchi University Graduate School of Medicine, Ube, 755-8505 Japan

**Supplemental Table S1. Increased 157 genes in the MED12m-positive uterine fibroids compared to the myometrium.**

| Gene symbol  | Myometrium (mean log <sub>2</sub> value) | MED12m-positive (mean log <sub>2</sub> value) | pvalue      | fold change (log <sub>2</sub> ) |
|--------------|------------------------------------------|-----------------------------------------------|-------------|---------------------------------|
| ADAM12       | 5.422913333                              | 9.39171                                       | 0.04759629  | 3.968796667                     |
| ANKRD20A11P  | 4.688646667                              | 6.947313333                                   | 0.000834011 | 2.258666667                     |
| APOE         | 8.436206667                              | 9.7836                                        | 0.01988447  | 1.347393333                     |
| ATP8B4       | 7.517466667                              | 9.22794                                       | 0.007370679 | 1.710473333                     |
| C1QA         | 6.42138                                  | 7.726036667                                   | 0.009037761 | 1.304656667                     |
| C1QB         | 7.89037                                  | 9.316896667                                   | 0.042026086 | 1.426526667                     |
| CAMK1G       | 5.945663333                              | 7.359053333                                   | 0.044382621 | 1.41339                         |
| CAPN6        | 8.36719                                  | 12.49338667                                   | 0.008123616 | 4.126196667                     |
| CCND1        | 8.468586667                              | 10.52389                                      | 0.021189081 | 2.055303333                     |
| CD24         | 8.62464                                  | 10.50618333                                   | 0.035027281 | 1.881543333                     |
| CDH8         | 5.59772                                  | 8.076816667                                   | 0.027585518 | 2.479096667                     |
| CKS2         | 5.67796                                  | 8.69129                                       | 0.023914641 | 3.01333                         |
| CNTN4        | 7.22025                                  | 8.30322                                       | 0.017360505 | 1.08297                         |
| COL4A1       | 9.722363333                              | 11.12408667                                   | 0.012538642 | 1.401723333                     |
| COL4A2       | 9.482096667                              | 10.87648333                                   | 0.00768962  | 1.394386667                     |
| CRABP2       | 7.859966667                              | 9.698476667                                   | 0.006139782 | 1.83851                         |
| DCX          | 5.438426667                              | 10.79778667                                   | 0.024635272 | 5.35936                         |
| DKK2         | 6.004376667                              | 7.91324                                       | 0.001167357 | 1.908863333                     |
| DNAH14       | 5.40168                                  | 7.638176667                                   | 0.049408205 | 2.236496667                     |
| EDA2R        | 7.431523333                              | 9.339376667                                   | 0.010020163 | 1.907853333                     |
| EGFL6        | 5.123846667                              | 8.127366667                                   | 0.039283196 | 3.00352                         |
| ELFN1        | 6.801236667                              | 8.044706667                                   | 0.032722229 | 1.24347                         |
| F2RL2        | 7.421633333                              | 9.074083333                                   | 0.047956583 | 1.65245                         |
| FAM212B      | 5.981703333                              | 7.38469                                       | 0.021012869 | 1.402986667                     |
| FAM229B      | 7.626286667                              | 9.124636667                                   | 0.009767166 | 1.49835                         |
| FCGR1C       | 6.46266                                  | 8.621743333                                   | 0.047905324 | 2.159083333                     |
| FCGR2A       | 7.177956667                              | 8.585713333                                   | 0.039678814 | 1.407756667                     |
| FCGR3B       | 6.69853                                  | 8.984753333                                   | 0.030465242 | 2.286223333                     |
| FHOD3        | 5.785456667                              | 6.919053333                                   | 0.035043074 | 1.133596667                     |
| GALNT13      | 5.601096667                              | 8.85739                                       | 0.00450621  | 3.256293333                     |
| GGH          | 5.786576667                              | 7.11289                                       | 0.005878918 | 1.326313333                     |
| GRIN2A       | 5.58568                                  | 8.40352                                       | 0.034107575 | 2.81784                         |
| H2AFZ        | 9.062193333                              | 10.15833667                                   | 0.007305764 | 1.096143333                     |
| HIST1H1D     | 7.30653                                  | 8.536256667                                   | 0.012042906 | 1.229726667                     |
| HIST1H2BG    | 5.678336667                              | 6.709666667                                   | 0.025236415 | 1.03133                         |
| HIST1H2BH    | 6.769416667                              | 8.309353333                                   | 0.039565312 | 1.539936667                     |
| HIST1H4C     | 8.927526667                              | 10.68711                                      | 0.002178193 | 1.759583333                     |
| HIST1H4F     | 7.090936667                              | 8.761933333                                   | 0.029598891 | 1.670996667                     |
| HIST1H4J     | 8.189606667                              | 10.52002333                                   | 0.022202703 | 2.330416667                     |
| HIST1H4K     | 8.207853333                              | 10.78962667                                   | 0.011577612 | 2.581773333                     |
| IGSF3        | 5.902806667                              | 8.913696667                                   | 0.013052975 | 3.01089                         |
| INS          | 6.946963333                              | 8.083373333                                   | 0.001866846 | 1.13641                         |
| ITM2C        | 8.955956667                              | 10.59957333                                   | 0.003957503 | 1.643616667                     |
| KIF5C        | 6.070986667                              | 8.98742                                       | 0.020159935 | 2.916433333                     |
| LOC101060256 | 5.633333333                              | 6.764363333                                   | 0.005107041 | 1.13103                         |
| LOC102723462 | 5.375436667                              | 7.15014                                       | 0.001647902 | 1.774703333                     |
| LRRC7        | 4.799883333                              | 9.53976                                       | 0.000596906 | 4.739876667                     |
| LRRN1        | 5.16803                                  | 7.24897                                       | 0.045102584 | 2.08094                         |
| LRRTM1       | 5.33428                                  | 6.771566667                                   | 0.048634723 | 1.437286667                     |
| MEST         | 8.246683333                              | 10.23329667                                   | 0.027865713 | 1.986613333                     |
| MEX3B        | 6.69355                                  | 7.92038                                       | 0.001868311 | 1.22683                         |
| MFAP2        | 7.904486667                              | 9.831586667                                   | 0.028408679 | 1.9271                          |
| MMP16        | 6.732336667                              | 8.55153                                       | 0.009587935 | 1.819193333                     |
| MSR1         | 6.793213333                              | 7.907763333                                   | 0.042869296 | 1.11455                         |
| MTCL1        | 6.2671                                   | 7.74076                                       | 0.02667011  | 1.47366                         |
| NAV2         | 8.13147                                  | 9.203343333                                   | 0.04391314  | 1.071873333                     |
| NDUFA6       | 8.085033333                              | 9.127296667                                   | 0.017270889 | 1.042263333                     |
| NETO2        | 6.020346667                              | 8.574523333                                   | 0.007439846 | 2.554176667                     |
| NHSL2        | 6.74297                                  | 7.821293333                                   | 0.016989287 | 1.078323333                     |
| NNAT         | 6.277476667                              | 7.9811                                        | 0.006417599 | 1.703623333                     |
| NPTX2        | 6.235363333                              | 7.343733333                                   | 0.026631293 | 1.10837                         |

|               |             |             |             |             |
|---------------|-------------|-------------|-------------|-------------|
| NTNG1         | 5.188786667 | 7.053853333 | 0.006325969 | 1.865066667 |
| OLFM1         | 7.121226667 | 8.158416667 | 0.026161139 | 1.03719     |
| PAGE4         | 4.22231     | 7.10244     | 0.004309832 | 2.88013     |
| PARP9         | 8.48129     | 9.635393333 | 0.006163065 | 1.154103333 |
| PCDH10        | 5.84376     | 8.02948     | 0.000233046 | 2.18572     |
| PCP4          | 10.3973     | 12.34629667 | 0.032111244 | 1.948996667 |
| PHGDH         | 7.028563333 | 8.172746667 | 0.004061869 | 1.144183333 |
| PLEKHG4B      | 5.701913333 | 6.976753333 | 0.002374067 | 1.27484     |
| POLH          | 7.255463333 | 8.365703333 | 0.025063259 | 1.11024     |
| PRLHR         | 5.951256667 | 7.46183     | 0.010221077 | 1.510573333 |
| PTCHD4        | 7.070283333 | 9.7155      | 0.016537881 | 2.645216667 |
| RNU11         | 8.97137     | 10.23241333 | 0.006033104 | 1.261043333 |
| RNVU1-6       | 6.879813333 | 8.038496667 | 0.044646411 | 1.158683333 |
| RPPH1         | 9.826066667 | 11.45211667 | 0.016784158 | 1.62605     |
| RPS19         | 10.15266333 | 11.17656333 | 0.040878628 | 1.0239      |
| RPS27L        | 6.73776     | 7.985196667 | 0.00650706  | 1.247436667 |
| SCARNA1       | 6.18569     | 7.406243333 | 0.049331557 | 1.220553333 |
| SCARNA10      | 8.75002     | 10.35652333 | 0.043127068 | 1.606503333 |
| SCARNA12      | 9.590036667 | 10.92709667 | 0.000505596 | 1.33706     |
| SCARNA5       | 9.326046667 | 10.70966    | 0.01083137  | 1.383613333 |
| SCARNA6       | 9.29158     | 10.93077    | 0.001743211 | 1.63919     |
| SCARNA7       | 10.55709333 | 11.56512333 | 0.006372725 | 1.00803     |
| SCARNA8       | 7.66158     | 9.21977     | 0.045956343 | 1.55819     |
| SCG5          | 4.872883333 | 6.653226667 | 0.016689777 | 1.780343333 |
| SCIN          | 4.840283333 | 6.955756667 | 0.043960416 | 2.115473333 |
| SEMA5A        | 8.406553333 | 9.571873333 | 0.010139933 | 1.16532     |
| 03-Sep        | 4.870143333 | 6.9245      | 0.004798961 | 2.054356667 |
| SLC7A3        | 5.611423333 | 8.54911     | 0.047217463 | 2.937686667 |
| SNORA14B      | 8.64935     | 10.18041    | 0.023800792 | 1.53106     |
| SNORA16A      | 10.76801333 | 12.34567    | 0.021956024 | 1.577656667 |
| SNORA20       | 11.00365333 | 12.16392333 | 0.044373449 | 1.16027     |
| SNORA23       | 11.78151    | 13.17872    | 0.015427725 | 1.39721     |
| SNORA24       | 10.63578    | 11.67957333 | 0.006587809 | 1.043793333 |
| SNORA36A      | 5.42991     | 7.159796667 | 0.038619946 | 1.729886667 |
| SNORA37       | 9.070866667 | 10.49658    | 0.004811809 | 1.425713333 |
| SNORA3B       | 7.512536667 | 8.583936667 | 0.010228968 | 1.0714      |
| SNORA50A      | 10.25553667 | 11.25639667 | 0.043087265 | 1.00086     |
| SNORA52       | 7.922526667 | 9.376156667 | 0.004225501 | 1.45363     |
| SNORA54       | 9.07371     | 10.26348667 | 0.006327522 | 1.189776667 |
| SNORA55       | 7.51368     | 8.606846667 | 0.014652366 | 1.093166667 |
| SNORA57       | 9.845093333 | 11.72496    | 0.028632107 | 1.879866667 |
| NORA59B .147C | 7.89878     | 9.113363333 | 0.046972229 | 1.214583333 |
| NORA59B .1911 | 7.89878     | 9.113363333 | 0.046972229 | 1.214583333 |
| SNORA5A       | 7.19035     | 8.562423333 | 0.006308433 | 1.372073333 |
| SNORA6        | 7.12769     | 8.243886667 | 0.03873327  | 1.116196667 |
| SNORA60       | 7.81028     | 9.98289     | 0.023639336 | 2.17261     |
| SNORA62       | 8.476063333 | 11.12652667 | 0.013377969 | 2.650463333 |
| SNORA65       | 9.840816667 | 11.61375333 | 0.008429764 | 1.772936667 |
| SNORA67       | 8.40564     | 9.55587     | 0.009879421 | 1.15023     |
| SNORA68       | 10.66850333 | 11.84433667 | 0.004352053 | 1.175833333 |
| SNORA71A      | 8.078836667 | 9.826036667 | 0.005608635 | 1.7472      |
| SNORA71B      | 8.09232     | 10.75246333 | 0.006506272 | 2.660143333 |
| SNORA71D      | 7.92425     | 9.745286667 | 0.016865099 | 1.821036667 |
| SNORA73A      | 11.30723333 | 12.53301    | 0.011299142 | 1.225776667 |
| SNORA8        | 9.45697     | 10.48335667 | 0.000610263 | 1.026386667 |
| SNORA80E      | 8.282556667 | 9.719726667 | 0.033900257 | 1.43717     |
| SNORA9        | 7.773303333 | 9.465563333 | 0.02668644  | 1.69226     |
| SNORD113-4    | 7.147606667 | 8.365526667 | 0.007308571 | 1.21792     |
| SNORD114-26   | 6.063526667 | 7.647946667 | 0.015387398 | 1.58442     |
| SNORD114-3    | 9.821783333 | 11.6766     | 0.009628139 | 1.854816667 |
| SNORD116-1    | 8.31966     | 9.390866667 | 0.033759197 | 1.071206667 |
| SNORD116-23   | 6.702643333 | 7.73212     | 0.010237396 | 1.029476667 |
| SNORD116-25   | 6.137396667 | 7.139876667 | 0.037214055 | 1.00248     |

|                 |             |             |             |             |
|-----------------|-------------|-------------|-------------|-------------|
| SNORD116-29     | 7.05273     | 8.597503333 | 0.010158052 | 1.544773333 |
| SNORD116-3 .186 | 10.06163333 | 11.10885    | 0.037101082 | 1.047216667 |
| SNORD116-3 .266 | 10.06163333 | 11.10885    | 0.037101082 | 1.047216667 |
| SNORD116-4      | 7.695433333 | 9.38714     | 0.014306524 | 1.691706667 |
| SNORD117        | 7.820043333 | 8.900966667 | 0.008078451 | 1.080923333 |
| SNORD15A        | 8.33867     | 9.42939     | 0.024779535 | 1.09072     |
| SNORD1C         | 10.88253    | 11.96088333 | 0.010046699 | 1.078353333 |
| SNORD25         | 6.39394     | 7.808403333 | 0.033484334 | 1.414463333 |
| SNORD27         | 10.01249    | 11.01879333 | 0.012212548 | 1.006303333 |
| SNORD37         | 6.097343333 | 7.587346667 | 0.020845497 | 1.490003333 |
| SNORD45B        | 9.62426     | 10.84894333 | 0.011495875 | 1.224683333 |
| SNORD48         | 9.360723333 | 10.76543    | 0.012557316 | 1.404706667 |
| SNORD54         | 8.278093333 | 9.70797     | 0.003516746 | 1.429876667 |
| SNORD59B        | 7.311333333 | 8.42612     | 0.031399364 | 1.114786667 |
| SNORD81         | 9.974816667 | 11.42231667 | 0.002127927 | 1.4475      |
| SYT11           | 8.046493333 | 9.306626667 | 0.005081316 | 1.260133333 |
| TDO2            | 3.98417     | 8.293736667 | 0.029840294 | 4.309566667 |
| TENM1           | 6.531933333 | 8.124283333 | 0.023554707 | 1.59235     |
| TFAP2C          | 5.2135      | 7.49248     | 0.042494244 | 2.27898     |
| TIMM8B          | 6.701846667 | 7.717073333 | 0.009145723 | 1.015226667 |
| TMEM256         | 7.20938     | 8.288306667 | 0.029819853 | 1.078926667 |
| TP53INP1        | 8.22494     | 9.446426667 | 0.012461348 | 1.221486667 |
| TRPC6           | 7.021733333 | 8.167506667 | 0.026613721 | 1.145773333 |
| TYMS            | 6.003066667 | 8.718653333 | 0.012669342 | 2.715586667 |
| TYROBP          | 8.737553333 | 10.10704    | 0.038344344 | 1.369486667 |
| UNC5D           | 6.150053333 | 8.567016667 | 0.016653572 | 2.416963333 |
| UQCRQ           | 6.775763333 | 7.79035     | 0.00586206  | 1.014586667 |
| VCAN            | 10.11187    | 11.90518    | 0.04451018  | 1.79331     |
| ZMAT3           | 8.702983333 | 10.13674333 | 0.04012292  | 1.43376     |
| ZNF561          | 8.822493333 | 10.07133333 | 0.027639258 | 1.24884     |
| ZNF711          | 7.785976667 | 8.963276667 | 0.027388711 | 1.1773      |
| ZNRD1           | 5.991786667 | 7.028516667 | 0.035227839 | 1.03673     |
| ZWINT           | 5.901303333 | 6.909453333 | 0.02981704  | 1.00815     |

---
