# Supplementary material for: Different DNA methylome, transcriptome and histological features in uterine fibroids with and without MED12 mutations
Source: PubMed Central journal article supplement (PMC9135739; doi:10.1038/s41598-022-12899-7), 2022-05-26
Supplement: 41598_2022_12899_MOESM4_ESM.pdf [file 41598_2022_12899_MOESM4_ESM.pdf]

**Different DNA methylome, transcriptome and histological features in uterine fibroids with and without MED12 mutations**

Ryo Maekawa\*, Department of Obstetrics and Gynecology, Yamaguchi University Graduate School of Medicine, Ube, 755-8505 Japan

Shun Sato, Department of Obstetrics and Gynecology, Yamaguchi University Graduate School of Medicine, Ube, 755-8505 Japan

Tetsuro Tamehisa, Department of Obstetrics and Gynecology, Yamaguchi University Graduate School of Medicine, Ube, 755-8505 Japan

Takahiro Sakai, Department of Obstetrics and Gynecology, Yamaguchi University Graduate School of Medicine, Ube, 755-8505 Japan

Takuya Kajimura, Department of Obstetrics and Gynecology, Yamaguchi University Graduate School of Medicine, Ube, 755-8505 Japan

Kotaro Sueoka, Department of Obstetrics and Gynecology, Yamaguchi University Graduate School of Medicine, Ube, 755-8505 Japan

Norihiro Sugino, Department of Obstetrics and Gynecology, Yamaguchi University Graduate School of Medicine, Ube, 755-8505 Japan

**Supplemental Table S2. Decreased 233 genes in the MED12m-positive uterine fibroids compared to the myometrium.**

| Gene symbol | Myometrium (mean log2 value) | MED12m-positive (mean log2 value) | pvalue      | fold change (log2) |
|-------------|------------------------------|-----------------------------------|-------------|--------------------|
| AASS        | 9.748826667                  | 8.513436667                       | 0.0029348   | -1.23539           |
| ABCA10      | 7.340423333                  | 4.49177                           | 0.018080599 | -2.848653333       |
| ABCA5       | 7.754806667                  | 6.020443333                       | 0.005725419 | -1.734363333       |
| ABCA6       | 8.034093333                  | 4.80032                           | 0.001323645 | -3.233773333       |
| ABCA8       | 8.1599                       | 4.327913333                       | 0.006306953 | -3.831986667       |
| ABCA9       | 8.429233333                  | 4.89665                           | 0.001115623 | -3.532583333       |
| ABCB1       | 8.197033333                  | 6.82289                           | 0.024063116 | -1.374143333       |
| ABCC9       | 10.50543                     | 9.120323333                       | 0.011091022 | -1.385106667       |
| ABI3BP      | 10.79399333                  | 9.272026667                       | 0.024557259 | -1.521966667       |
| ACACB       | 7.90981                      | 6.905303333                       | 0.00370169  | -1.004506667       |
| ACSL4       | 9.06459                      | 8.06353                           | 0.006570562 | -1.00106           |
| ACSS3       | 9.326046667                  | 5.248833333                       | 0.000388311 | -4.077213333       |
| ADAMTSL3    | 7.57202                      | 5.600943333                       | 0.023311931 | -1.971076667       |
| ADH1B       | 9.478346667                  | 4.666276667                       | 0.012743992 | -4.81207           |
| ADIRF       | 8.698146667                  | 7.54842                           | 0.041175099 | -1.149726667       |
| AFF3        | 8.78357                      | 7.173906667                       | 0.013226125 | -1.609663333       |
| AHSA2       | 8.336113333                  | 7.33248                           | 0.004873482 | -1.003633333       |
| ALDH1A1     | 10.19096667                  | 6.913166667                       | 0.001986791 | -3.2778            |
| AMOTL2      | 8.40608                      | 6.607006667                       | 0.004693265 | -1.799073333       |
| ANG         | 7.447553333                  | 6.34192                           | 0.005346135 | -1.105633333       |
| ANKS1B      | 6.87942                      | 5.744333333                       | 0.011821804 | -1.135086667       |
| AOC3        | 10.15453                     | 8.396973333                       | 0.027391144 | -1.757556667       |
| AOX1        | 6.86736                      | 5.031966667                       | 0.003183359 | -1.835393333       |
| APOL1       | 7.881446667                  | 6.63028                           | 0.003014114 | -1.251166667       |
| ARAP2       | 7.295283333                  | 5.885053333                       | 0.002648784 | -1.41023           |
| ARHGAP15    | 7.412243333                  | 6.401236667                       | 0.014712474 | -1.011006667       |
| ARHGEF6     | 9.222966667                  | 7.82366                           | 0.00354375  | -1.399306667       |
| ASPA        | 7.08642                      | 4.858403333                       | 0.01749132  | -2.228016667       |
| ATXN7       | 9.222366667                  | 8.19572                           | 0.005533205 | -1.026516667       |
| BHMT2       | 7.433436667                  | 6.243226667                       | 0.016690952 | -1.19021           |
| C14orf28    | 8.839153333                  | 7.69549                           | 0.045621477 | -1.143663333       |
| C1QTNF7     | 8.238923333                  | 6.137643333                       | 0.037292676 | -2.10128           |
| C1R         | 9.72456                      | 8.3028                            | 0.009334312 | -1.42176           |
| C1S         | 11.20943                     | 9.065                             | 0.007408962 | -2.14443           |
| C1orf198    | 10.10221                     | 9.05811                           | 0.026454002 | -1.0441            |
| C4orf19     | 7.025293333                  | 5.606596667                       | 0.036545965 | -1.418696667       |
| C7          | 10.84609333                  | 8.060433333                       | 0.002093929 | -2.78566           |
| C9orf131    | 7.29756                      | 6.294483333                       | 0.023575213 | -1.003076667       |
| CC2D2B      | 7.18917                      | 5.973463333                       | 0.010238936 | -1.215706667       |
| CCDC109B    | 8.851763333                  | 7.72472                           | 0.00544665  | -1.127043333       |
| CCDC80      | 12.46395667                  | 11.23359                          | 0.025231921 | -1.230366667       |
| CCL5        | 7.593676667                  | 6.554916667                       | 0.001942654 | -1.03876           |
| CD200       | 9.801933333                  | 8.15543                           | 0.034035378 | -1.646503333       |
| CD69        | 7.18033                      | 5.549303333                       | 0.048656282 | -1.631026667       |
| CERS6       | 10.1512                      | 9.043773333                       | 0.034311807 | -1.107426667       |
| CFLAR       | 9.71957                      | 8.32744                           | 0.003257665 | -1.39213           |
| CHL1        | 7.03769                      | 5.425456667                       | 0.01462042  | -1.612233333       |
| CLIP4       | 8.458183333                  | 7.16574                           | 0.01116939  | -1.292443333       |
| CLMN        | 7.8156                       | 6.583936667                       | 0.025719511 | -1.231663333       |
| COL21A1     | 8.048123333                  | 6.782186667                       | 0.001499394 | -1.265936667       |
| CPEB2       | 9.627703333                  | 7.721633333                       | 0.001304485 | -1.90607           |
| CPEB3       | 6.98581                      | 5.917086667                       | 0.034629733 | -1.068723333       |
| CPED1       | 10.13617                     | 8.913413333                       | 0.00926668  | -1.222756667       |
| CPNE8       | 8.14212                      | 6.99273                           | 0.003526472 | -1.14939           |
| CRHBP       | 6.914143333                  | 5.841423333                       | 0.009298081 | -1.07272           |
| CRIM1       | 9.881896667                  | 8.81794                           | 0.025323488 | -1.063956667       |

|              |             |             |             |              |
|--------------|-------------|-------------|-------------|--------------|
| CYR61        | 10.80813333 | 7.710783333 | 0.00417467  | -3.09735     |
| DEPTOR       | 9.133593333 | 7.026576667 | 0.011974787 | -2.107016667 |
| DGKH         | 9.116733333 | 7.811033333 | 0.004032872 | -1.3057      |
| DNAJB4       | 9.91632     | 8.87551     | 0.015638228 | -1.04081     |
| DPT          | 8.754213333 | 5.555486667 | 0.02532955  | -3.198726667 |
| DUSP1        | 12.37307    | 9.734406667 | 0.001090811 | -2.638663333 |
| EBF1         | 9.965006667 | 8.4465      | 0.000599648 | -1.518506667 |
| ECM2         | 8.681086667 | 7.0781      | 0.001914691 | -1.602986667 |
| EDNRB        | 9.055143333 | 7.36309     | 0.001399122 | -1.692053333 |
| EFEMP1       | 9.615313333 | 7.239266667 | 0.001179125 | -2.376046667 |
| EGR1         | 10.71887667 | 7.99405     | 0.033420743 | -2.724826667 |
| EPB41L2      | 9.636013333 | 8.315026667 | 0.018556499 | -1.320986667 |
| FAM46A       | 8.445166667 | 7.170696667 | 0.000906329 | -1.27447     |
| FAM69A       | 9.19713     | 8.045856667 | 0.008738778 | -1.151273333 |
| FAXDC2       | 9.735333333 | 8.51072     | 0.032298399 | -1.224613333 |
| FGL2         | 9.41001     | 7.734396667 | 0.001567396 | -1.675613333 |
| FHL5         | 9.108466667 | 6.731316667 | 0.006663944 | -2.37715     |
| FLJ42393     | 8.218886667 | 6.40452     | 0.001819833 | -1.814366667 |
| FRZB         | 9.703836667 | 8.005413333 | 0.005854771 | -1.698423333 |
| GAB1         | 10.19798667 | 8.794046667 | 0.015286282 | -1.40394     |
| GALNT7       | 8.36433     | 7.28522     | 0.042440048 | -1.07911     |
| GLS          | 9.908836667 | 8.854713333 | 0.01970696  | -1.054123333 |
| GNAI1        | 8.6754      | 7.621526667 | 0.000622655 | -1.053873333 |
| GPC4         | 7.983066667 | 6.3656      | 0.015330124 | -1.617466667 |
| GPM6A        | 7.34808     | 5.783146667 | 0.001344819 | -1.564933333 |
| GREB1L       | 6.69534     | 4.655383333 | 0.043117835 | -2.039956667 |
| GSAP         | 6.948843333 | 5.758056667 | 0.035665114 | -1.190786667 |
| GSTM5        | 8.850226667 | 4.947366667 | 0.014110955 | -3.90286     |
| GUCY1A3      | 9.418113333 | 8.24803     | 0.029401323 | -1.170083333 |
| GUCY1B3      | 10.16829333 | 8.751096667 | 0.005349633 | -1.417196667 |
| GZMK         | 6.722366667 | 4.967633333 | 0.046086194 | -1.754733333 |
| HBEGF        | 8.74029     | 6.431773333 | 0.008062826 | -2.308516667 |
| HERC3        | 8.821906667 | 7.64152     | 0.008820107 | -1.180386667 |
| HEYL         | 8.528646667 | 7.242666667 | 0.041636057 | -1.28598     |
| HLF          | 8.24091     | 6.698243333 | 0.005319345 | -1.542666667 |
| IFI44L       | 8.900826667 | 7.69114     | 0.038514901 | -1.209686667 |
| IL6ST        | 11.07552    | 10.04637333 | 0.012924247 | -1.029146667 |
| INADL        | 8.067313333 | 6.819323333 | 0.018342488 | -1.24799     |
| INPP4B       | 8.710003333 | 7.215613333 | 0.031661732 | -1.49439     |
| INSIG2       | 8.89284     | 7.840563333 | 0.032186703 | -1.052276667 |
| ITGA6        | 10.42291333 | 9.31295     | 0.020967283 | -1.109963333 |
| JAZF1        | 9.833296667 | 8.408583333 | 0.036377936 | -1.424713333 |
| JPH1         | 8.617016667 | 6.860613333 | 0.008477701 | -1.756403333 |
| JUN          | 10.42587333 | 8.730743333 | 0.009021332 | -1.69513     |
| KIAA0040     | 7.199153333 | 6.07056     | 0.03856741  | -1.128593333 |
| KLF4         | 8.432523333 | 6.46581     | 0.004513677 | -1.966713333 |
| KLF8         | 7.466816667 | 6.411433333 | 0.034989308 | -1.055383333 |
| KRT19        | 7.85503     | 6.42584     | 0.038260875 | -1.42919     |
| LATS2        | 9.084853333 | 8.070503333 | 0.012296787 | -1.01435     |
| LDB2         | 10.66204333 | 9.415726667 | 0.004903013 | -1.246316667 |
| LGR4         | 9.009346667 | 7.91016     | 0.006760149 | -1.099186667 |
| LIFR         | 11.14448667 | 8.732326667 | 0.000491178 | -2.41216     |
| LINC00472    | 6.960333333 | 5.778956667 | 0.027812049 | -1.181376667 |
| LINC00969    | 7.286803333 | 6.152106667 | 0.005162821 | -1.134696667 |
| LINC01140    | 7.00869     | 5.876406667 | 0.012523059 | -1.132283333 |
| LOC100131541 | 6.88243     | 5.44609     | 0.027143026 | -1.43634     |
| LOC100287934 | 7.892086667 | 6.668026667 | 0.011422015 | -1.22406     |
| LPCAT2       | 9.70569     | 8.485106667 | 0.000966114 | -1.220583333 |

|          |             |             |             |              |
|----------|-------------|-------------|-------------|--------------|
| LRRFIP1  | 11.15722    | 9.903573333 | 0.026669617 | -1.253646667 |
| LRRFIP2  | 8.715023333 | 7.633303333 | 0.014775272 | -1.08172     |
| LY6G5B   | 8.959383333 | 7.665793333 | 0.018470132 | -1.29359     |
| LYST     | 9.200453333 | 7.995356667 | 0.002998859 | -1.205096667 |
| MAMDC2   | 10.55758    | 9.55304     | 0.008006751 | -1.00454     |
| MAML2    | 8.605423333 | 7.432356667 | 0.012255393 | -1.173066667 |
| MAOA     | 8.27904     | 6.978996667 | 0.013337174 | -1.300043333 |
| MAPK10   | 10.21522667 | 8.310226667 | 0.035793222 | -1.905       |
| 02-Mar   | 7.749756667 | 6.589513333 | 0.001706167 | -1.160243333 |
| MBNL2    | 11.64991333 | 10.52447667 | 0.009375071 | -1.125436667 |
| MBP      | 7.475663333 | 6.313596667 | 0.000614502 | -1.162066667 |
| MEOX2    | 7.841953333 | 6.568373333 | 0.017026569 | -1.27358     |
| MGARP    | 6.88712     | 5.68053     | 0.00606101  | -1.20659     |
| MIR186   | 6.65969     | 5.19376     | 0.041972066 | -1.46593     |
| MIR99AHG | 9.608566667 | 8.012783333 | 0.025351503 | -1.595783333 |
| MLLT4    | 8.64622     | 7.410166667 | 0.014948245 | -1.236053333 |
| MTUS1    | 8.254003333 | 7.031096667 | 0.011582925 | -1.222906667 |
| MYCT1    | 8.92133     | 7.677266667 | 0.003054672 | -1.244063333 |
| MYOM1    | 7.71292     | 5.911676667 | 0.010191801 | -1.801243333 |
| N4BP2L1  | 6.657516667 | 5.47363     | 0.01572497  | -1.183886667 |
| NAALADL2 | 7.878583333 | 6.725446667 | 0.008655271 | -1.153136667 |
| NAV3     | 7.42607     | 5.976093333 | 0.04890671  | -1.449976667 |
| NDRG1    | 10.24195667 | 8.96798     | 0.00714335  | -1.273976667 |
| NDRG2    | 9.017893333 | 8.007146667 | 0.015228984 | -1.010746667 |
| NEGR1    | 8.516783333 | 6.123956667 | 0.023808376 | -2.392826667 |
| NFIB     | 11.30307    | 10.11457667 | 0.043950432 | -1.188493333 |
| NLGN1    | 6.89103     | 5.237363333 | 0.043088299 | -1.653666667 |
| NR3C1    | 9.118153333 | 8.081223333 | 0.034791761 | -1.03693     |
| NR3C2    | 7.721546667 | 6.32238     | 0.006993641 | -1.399166667 |
| NR4A1    | 9.57817     | 7.145743333 | 0.025790666 | -2.432426667 |
| NR4A2    | 6.9441      | 5.623016667 | 0.014849262 | -1.321083333 |
| NTN4     | 8.914676667 | 7.668123333 | 0.00186857  | -1.246553333 |
| OLFML1   | 9.096043333 | 6.291046667 | 0.002588982 | -2.804996667 |
| OMD      | 9.024366667 | 6.802826667 | 0.007321983 | -2.22154     |
| OR2A4    | 7.690326667 | 6.496646667 | 0.046024377 | -1.19368     |
| PDE10A   | 8.298633333 | 6.807646667 | 0.000235971 | -1.490986667 |
| PDE2A    | 7.43672     | 6.35326     | 0.012671798 | -1.08346     |
| PHACTR2  | 9.301916667 | 8.245       | 0.004534503 | -1.056916667 |
| PHF11    | 7.6567      | 6.596633333 | 0.040091296 | -1.060066667 |
| PIWIL4   | 6.726026667 | 5.71492     | 0.021196293 | -1.011106667 |
| PLA2G4A  | 7.7935      | 5.952393333 | 0.01393893  | -1.841106667 |
| PLBD1    | 8.25081     | 7.215186667 | 0.047702353 | -1.035623333 |
| PLCB4    | 8.51734     | 6.79016     | 0.000483418 | -1.72718     |
| PLCE1    | 9.55058     | 7.642446667 | 0.009579465 | -1.908133333 |
| PLEKHH2  | 10.03808667 | 8.117016667 | 0.005030583 | -1.92107     |
| PODN     | 9.105926667 | 7.596653333 | 0.047533908 | -1.509273333 |
| PPARG    | 7.52326     | 6.400166667 | 0.019026832 | -1.123093333 |
| PPM1K    | 9.096873333 | 7.502313333 | 0.035725793 | -1.59456     |
| PPP1R15A | 8.247773333 | 7.111893333 | 0.024170764 | -1.13588     |
| PRICKLE1 | 9.418966667 | 7.998136667 | 0.002842177 | -1.42083     |
| PRKAA2   | 7.94503     | 6.854306667 | 0.041386737 | -1.090723333 |
| PROS1    | 9.169886667 | 8.14633     | 0.024283222 | -1.023556667 |
| PROS2P   | 8.810276667 | 7.688933333 | 0.026776517 | -1.121343333 |
| PTER     | 8.196223333 | 7.13398     | 0.000344475 | -1.062243333 |
| PTGR1    | 8.62082     | 7.619456667 | 0.028579938 | -1.001363333 |
| PYGM     | 7.5531      | 6.320143333 | 0.043452611 | -1.232956667 |
| RAPGEF4  | 8.307466667 | 7.065683333 | 0.001259493 | -1.241783333 |
| RASA4    | 8.612376667 | 7.324823333 | 0.037281812 | -1.287553333 |

|          |             |             |             |              |
|----------|-------------|-------------|-------------|--------------|
| RASSF9   | 7.86323     | 6.511076667 | 0.022552194 | -1.352153333 |
| RCAN2    | 8.935136667 | 7.642163333 | 0.000331855 | -1.292973333 |
| REPS2    | 9.059516667 | 7.45361     | 0.009336218 | -1.605906667 |
| RFTN2    | 8.464223333 | 6.733506667 | 0.011509489 | -1.730716667 |
| RHOBTB3  | 8.975396667 | 7.740023333 | 0.00564689  | -1.235373333 |
| RNF180   | 8.979106667 | 7.45919     | 0.001829906 | -1.519916667 |
| RORA     | 8.60054     | 6.942406667 | 0.003203566 | -1.658133333 |
| RSPO1    | 9.43872     | 7.623133333 | 0.046087151 | -1.815586667 |
| SAMD4A   | 8.821523333 | 7.751276667 | 0.01851205  | -1.070246667 |
| SCML1    | 7.331853333 | 6.067396667 | 0.037008665 | -1.264456667 |
| SCN7A    | 9.34427     | 5.178493333 | 0.000385586 | -4.165776667 |
| SDC4     | 9.481313333 | 8.312136667 | 0.002357617 | -1.169176667 |
| SELE     | 7.581963333 | 5.639383333 | 0.037248865 | -1.94258     |
| SELP     | 8.126846667 | 6.969216667 | 0.022381909 | -1.15763     |
| SERPINB9 | 7.912003333 | 6.750516667 | 0.006547426 | -1.161486667 |
| SERPING1 | 11.22260333 | 9.969053333 | 0.017911776 | -1.25355     |
| SLC16A4  | 6.84775     | 5.658933333 | 0.00823011  | -1.188816667 |
| SLC16A9  | 7.886943333 | 6.366746667 | 0.033658058 | -1.520196667 |
| SLC25A27 | 8.232906667 | 6.717246667 | 0.013954891 | -1.51566     |
| SLC2A3   | 9.607473333 | 8.451123333 | 0.010199765 | -1.15635     |
| SLC37A3  | 10.05817333 | 8.90076     | 0.003238978 | -1.157413333 |
| SLC6A16  | 6.773103333 | 5.71736     | 0.006996246 | -1.055743333 |
| SLC7A2   | 8.707266667 | 6.995096667 | 0.009578302 | -1.71217     |
| SLFN11   | 8.294676667 | 6.530973333 | 0.00022178  | -1.763703333 |
| SLFN12L  | 6.9645      | 5.888536667 | 0.014232265 | -1.075963333 |
| SND1-IT1 | 7.07089     | 5.84881     | 0.010108399 | -1.22208     |
| SNRPA1   | 7.281813333 | 5.906386667 | 0.000857538 | -1.375426667 |
| SNX25    | 8.047483333 | 7.03118     | 0.001540428 | -1.016303333 |
| SORBS2   | 7.92815     | 6.649746667 | 0.00467921  | -1.278403333 |
| SRPX     | 9.371483333 | 7.61439     | 0.038304007 | -1.757093333 |
| STEAP2   | 8.041236667 | 6.12969     | 5.87E-05    | -1.911546667 |
| STEAP4   | 9.346616667 | 6.501563333 | 0.010813621 | -2.845053333 |
| STXBP5   | 8.5045      | 7.296296667 | 0.003360091 | -1.208203333 |
| SYDE2    | 7.991116667 | 6.794253333 | 0.013150244 | -1.196863333 |
| SYPL1    | 10.17364667 | 9.15191     | 0.006087493 | -1.021736667 |
| SYTL4    | 9.653346667 | 7.96264     | 0.007053099 | -1.690706667 |
| TEX15    | 9.14342     | 6.65959     | 0.009019805 | -2.48383     |
| TFPI     | 8.6311      | 7.02616     | 0.013800323 | -1.60494     |
| TGFBR2   | 10.80762333 | 9.75096     | 0.015684196 | -1.056663333 |
| THBD     | 8.354823333 | 7.033913333 | 0.002774056 | -1.32091     |
| TJP1     | 11.67742    | 10.61753333 | 0.038239876 | -1.059886667 |
| TLR3     | 8.68699     | 6.911113333 | 0.017516552 | -1.775876667 |
| TMEM144  | 7.021736667 | 5.76735     | 0.03616886  | -1.254386667 |
| TMTC1    | 8.363153333 | 7.339756667 | 0.02720728  | -1.023396667 |
| TNXB     | 9.174756667 | 7.453253333 | 0.00964538  | -1.721503333 |
| TRIB1    | 8.281366667 | 6.951846667 | 0.007548831 | -1.32952     |
| TRPC4    | 8.41728     | 6.195093333 | 0.008327742 | -2.222186667 |
| TSPAN7   | 10.44686    | 9.068643333 | 0.010205712 | -1.378216667 |
| TTC39C   | 8.012956667 | 6.89252     | 0.005036023 | -1.120436667 |
| TLL7     | 8.6943      | 7.626946667 | 0.030152677 | -1.067353333 |
| TXNRD1   | 9.73557     | 8.67603     | 0.012465588 | -1.05954     |
| ULK4     | 7.197413333 | 5.921273333 | 0.014888962 | -1.27614     |
| UST      | 7.880436667 | 6.874803333 | 0.006556146 | -1.005633333 |
| WEE1     | 9.66709     | 7.38419     | 0.000495552 | -2.2829      |
| WWC2     | 8.69584     | 7.576576667 | 0.040384387 | -1.119263333 |
| ZBTB20   | 9.87607     | 8.79829     | 0.008862945 | -1.07778     |
| ZC3H6    | 9.231126667 | 8.20179     | 0.038952625 | -1.029336667 |
| ZFHX4    | 8.06592     | 6.079796667 | 0.028101837 | -1.986123333 |

|         |             |             |             |          |
|---------|-------------|-------------|-------------|----------|
| ZFPM2   | 9.931136667 | 7.726116667 | 0.035697956 | -2.20502 |
| ZNF204P | 6.952393333 | 4.382143333 | 0.038119671 | -2.57025 |
| ZNF483  | 7.83777     | 6.56585     | 0.008555543 | -1.27192 |

---
