# Supplementary material for: Different DNA methylome, transcriptome and histological features in uterine fibroids with and without MED12 mutations
Source: PubMed Central journal article supplement (PMC9135739; doi:10.1038/s41598-022-12899-7), 2022-05-26
Supplement: 41598_2022_12899_MOESM5_ESM.pdf [file 41598_2022_12899_MOESM5_ESM.pdf]

**Different DNA methylome, transcriptome and histological features in uterine fibroids with and without MED12 mutations**

Ryo Maekawa\*, Department of Obstetrics and Gynecology, Yamaguchi University Graduate School of Medicine, Ube, 755-8505 Japan

Shun Sato, Department of Obstetrics and Gynecology, Yamaguchi University Graduate School of Medicine, Ube, 755-8505 Japan

Tetsuro Tamehisa, Department of Obstetrics and Gynecology, Yamaguchi University Graduate School of Medicine, Ube, 755-8505 Japan

Takahiro Sakai, Department of Obstetrics and Gynecology, Yamaguchi University Graduate School of Medicine, Ube, 755-8505 Japan

Takuya Kajimura, Department of Obstetrics and Gynecology, Yamaguchi University Graduate School of Medicine, Ube, 755-8505 Japan

Kotaro Sueoka, Department of Obstetrics and Gynecology, Yamaguchi University Graduate School of Medicine, Ube, 755-8505 Japan

Norihiro Sugino, Department of Obstetrics and Gynecology, Yamaguchi University Graduate School of Medicine, Ube, 755-8505 Japan

**Supplemental Table S3. Increased 110 genes in the MED12m-negative uterine fibroids compared to the myometrium.**

| Gene symbol  | Myometrium (mean log <sub>2</sub> value) | MED12m-negative (mean log <sub>2</sub> value) | pvalue      | fold change (log <sub>2</sub> ) |
|--------------|------------------------------------------|-----------------------------------------------|-------------|---------------------------------|
| ADAM12       | 5.422913333                              | 7.4077                                        | 0.000701842 | 1.984786667                     |
| ASB5         | 4.924286667                              | 7.799378889                                   | 0.000943875 | 2.875092222                     |
| ATP8B4       | 7.517466667                              | 9.132755556                                   | 0.004462608 | 1.615288889                     |
| BCL11A       | 5.50903                                  | 7.279942222                                   | 0.005534676 | 1.770912222                     |
| CAPN6        | 8.36719                                  | 11.83462889                                   | 0.016983595 | 3.467438889                     |
| CCND1        | 8.468586667                              | 10.04997778                                   | 0.020288854 | 1.581391111                     |
| CDH8         | 5.59772                                  | 7.049057778                                   | 0.010478488 | 1.451337778                     |
| CHI3L1       | 5.329746667                              | 6.75988                                       | 0.039259895 | 1.430133333                     |
| CHRM2        | 5.075763333                              | 6.746512222                                   | 0.015996281 | 1.670748889                     |
| CKS2         | 5.67796                                  | 8.119026667                                   | 0.000614882 | 2.441066667                     |
| CLVS2        | 5.999313333                              | 8.098232222                                   | 0.022211317 | 2.098918889                     |
| CPNE5        | 5.858046667                              | 7.3004                                        | 0.003552735 | 1.442353333                     |
| CRISPLD1     | 6.514976667                              | 7.531031111                                   | 0.008144123 | 1.016054444                     |
| DCX          | 5.438426667                              | 8.669886667                                   | 0.000631261 | 3.23146                         |
| DKK2         | 6.004376667                              | 7.510278889                                   | 0.004274208 | 1.505902222                     |
| DNAH14       | 5.40168                                  | 7.84864                                       | 0.00015466  | 2.44696                         |
| EDA2R        | 7.431523333                              | 8.765076667                                   | 0.013544941 | 1.333553333                     |
| EFNA5        | 5.733176667                              | 6.777223333                                   | 0.008392383 | 1.044046667                     |
| EYA4         | 5.44283                                  | 7.907221111                                   | 0.001653914 | 2.464391111                     |
| FAM171A2     | 6.032046667                              | 7.220955556                                   | 0.001501585 | 1.188908889                     |
| FAM229B      | 7.626286667                              | 8.786267778                                   | 0.002406961 | 1.159981111                     |
| FKBP2        | 8.1321                                   | 9.14771                                       | 0.000480323 | 1.01561                         |
| GALNT13      | 5.601096667                              | 8.309974444                                   | 0.000623235 | 2.708877778                     |
| GPR34        | 6.000876667                              | 7.163473333                                   | 0.00225998  | 1.162596667                     |
| GRIN2A       | 5.58568                                  | 7.030981111                                   | 0.000518449 | 1.445301111                     |
| H19          | 9.388316667                              | 11.20927222                                   | 0.013347768 | 1.820955556                     |
| HIST1H1D     | 7.30653                                  | 8.601001111                                   | 0.012609109 | 1.294471111                     |
| HIST1H2BH    | 6.769416667                              | 7.861736667                                   | 0.028463551 | 1.09232                         |
| HIST1H2BM    | 5.722036667                              | 6.879416667                                   | 0.000888068 | 1.15738                         |
| HIST1H3B     | 5.677053333                              | 6.945531111                                   | 0.003726073 | 1.268477778                     |
| HIST1H3F     | 5.969266667                              | 7.046711111                                   | 0.000429715 | 1.077444444                     |
| HIST1H4C     | 8.927526667                              | 10.79441444                                   | 0.000325308 | 1.866887778                     |
| HIST1H4F     | 7.090936667                              | 8.24444                                       | 0.010191761 | 1.153503333                     |
| HIST1H4J     | 8.189606667                              | 9.946696667                                   | 4.02E-06    | 1.75709                         |
| HIST1H4K     | 8.207853333                              | 10.19739778                                   | 2.38E-06    | 1.989544444                     |
| HMGA2        | 5.49236                                  | 6.716613333                                   | 0.011589974 | 1.224253333                     |
| HOXA13       | 7.005936667                              | 8.123315556                                   | 9.67E-05    | 1.117378889                     |
| HSD17B6      | 8.23956                                  | 9.890976667                                   | 0.042435761 | 1.651416667                     |
| IGSF3        | 5.902806667                              | 7.144214444                                   | 0.002306033 | 1.241407778                     |
| KIF5C        | 6.070986667                              | 7.359553333                                   | 0.007779155 | 1.288566667                     |
| LEFTY2       | 7.85181                                  | 9.508187778                                   | 0.022891948 | 1.656377778                     |
| LOC101060256 | 5.633333333                              | 6.728634444                                   | 0.000157943 | 1.095301111                     |
| LPAR4        | 6.359553333                              | 7.835114444                                   | 0.007025299 | 1.475561111                     |
| LRRC69       | 4.68204                                  | 7.157974444                                   | 0.011863159 | 2.475934444                     |
| LRRC7        | 4.799883333                              | 7.414542222                                   | 0.005407631 | 2.614658889                     |
| LRRTM1       | 5.33428                                  | 6.945601111                                   | 0.003223109 | 1.611321111                     |
| MFAP2        | 7.904486667                              | 8.978418889                                   | 0.004164922 | 1.073932222                     |
| MMP11        | 6.63188                                  | 7.906231111                                   | 0.008585485 | 1.274351111                     |
| MMP16        | 6.732336667                              | 8.255667778                                   | 0.007342644 | 1.523331111                     |
| MSL3P1       | 6.340436667                              | 7.404744444                                   | 0.043781406 | 1.064307778                     |
| NCAM2        | 5.909763333                              | 7.072071111                                   | 0.012123662 | 1.162307778                     |
| NDNF         | 6.397543333                              | 7.439558889                                   | 0.047564835 | 1.042015556                     |
| NETO2        | 6.020346667                              | 7.612875556                                   | 0.000343125 | 1.592528889                     |
| NKAIN4       | 5.65879                                  | 6.801412222                                   | 0.033816714 | 1.142622222                     |
| OSR1         | 5.74873                                  | 7.133701111                                   | 0.005040373 | 1.384971111                     |
| PAK3         | 6.940193333                              | 8.27935                                       | 0.004992667 | 1.339156667                     |
| PAPPA2       | 5.771596667                              | 7.323244444                                   | 0.025240852 | 1.551647778                     |
| PCDH10       | 5.84376                                  | 7.062173333                                   | 0.000653765 | 1.218413333                     |
| PCDH20       | 7.04882                                  | 8.106173333                                   | 0.030432804 | 1.057353333                     |
| PKP2         | 7.0192                                   | 8.239058889                                   | 0.000640676 | 1.219858889                     |
| PLAG1        | 5.10123                                  | 7.559017778                                   | 0.002398997 | 2.457787778                     |

|                 |             |             |             |             |
|-----------------|-------------|-------------|-------------|-------------|
| PMAIP1          | 4.94694     | 6.870595556 | 0.003350563 | 1.923655556 |
| PPP1R1A         | 6.811956667 | 8.019911111 | 0.010324418 | 1.207954444 |
| PRR16           | 6.775833333 | 8.25879     | 0.004503623 | 1.482956667 |
| PTCHD4          | 7.070283333 | 8.72105     | 0.001339594 | 1.650766667 |
| RNU11           | 8.97137     | 10.25805333 | 0.00166812  | 1.286683333 |
| RPPH1           | 9.826066667 | 11.13882778 | 0.01717141  | 1.312761111 |
| SATB2           | 7.33533     | 9.974545556 | 4.43E-05    | 2.639215556 |
| SCARNA11        | 7.65175     | 8.697533333 | 0.021932504 | 1.045783333 |
| SCARNA12        | 9.590036667 | 10.63218    | 0.000108799 | 1.042143333 |
| SCARNA6         | 9.29158     | 10.39910444 | 0.001932627 | 1.107524444 |
| SFRP2           | 5.591186667 | 7.057392222 | 0.039173286 | 1.466205556 |
| SLC39A8         | 7.775756667 | 9.155683333 | 0.017471352 | 1.379926667 |
| SLC7A3          | 5.611423333 | 7.924423333 | 0.012477223 | 2.313       |
| SNORA23         | 11.78151    | 13.21359778 | 0.004152198 | 1.432087778 |
| SNORA2A         | 6.04987     | 8.897023333 | 1.77E-05    | 2.847153333 |
| SNORA33         | 6.533803333 | 7.601906667 | 0.015856469 | 1.068103333 |
| SNORA37         | 9.070866667 | 10.13583111 | 0.000903604 | 1.064964444 |
| SNORA38B        | 8.027563333 | 10.50262778 | 0.002303251 | 2.475064444 |
| SNORA57         | 9.845093333 | 11.35370778 | 9.44E-05    | 1.508614444 |
| SNORA59B .14700 | 7.89878     | 8.985842222 | 0.011437896 | 1.087062222 |
| SNORA59B .19117 | 7.89878     | 8.985842222 | 0.011437896 | 1.087062222 |
| SNORA60         | 7.81028     | 9.468008889 | 0.019911221 | 1.657728889 |
| SNORA62         | 8.476063333 | 10.17407667 | 0.004339143 | 1.698013333 |
| SNORA65         | 9.840816667 | 11.18672778 | 0.005244587 | 1.345911111 |
| SNORA71A        | 8.078836667 | 9.292916667 | 0.002795619 | 1.21408     |
| SNORA71B        | 8.09232     | 11.08355333 | 0.000969782 | 2.991233333 |
| SNORA71D        | 7.92425     | 9.480146667 | 0.003575136 | 1.555896667 |
| SNORA80E        | 8.282556667 | 9.289277778 | 0.033102848 | 1.006721111 |
| SNORD116-23     | 6.702643333 | 7.878206667 | 0.006025672 | 1.175563333 |
| SNORD116-25     | 6.137396667 | 7.326318889 | 0.038669135 | 1.188922222 |
| SNORD116-26     | 6.434883333 | 7.862491111 | 0.014811745 | 1.427607778 |
| SNORD116-29     | 7.05273     | 8.502983333 | 0.006974389 | 1.450253333 |
| SNORD116-4      | 7.695433333 | 9.295413333 | 0.006483356 | 1.59998     |
| SNORD25         | 6.39394     | 7.485636667 | 0.007183026 | 1.091696667 |
| SNORD27         | 10.01249    | 11.12710889 | 0.001640929 | 1.114618889 |
| SNORD42A        | 9.614533333 | 10.82339333 | 0.001341457 | 1.20886     |
| SNORD45B        | 9.62426     | 10.68610556 | 0.011416906 | 1.061845556 |
| SNORD48         | 9.360723333 | 10.65342667 | 0.010994434 | 1.292703333 |
| SNORD52         | 7.81795     | 9.055483333 | 0.000381233 | 1.237533333 |
| SNORD81         | 9.974816667 | 11.02102222 | 0.001520869 | 1.046205556 |
| TERC            | 6.78311     | 7.952556667 | 5.69E-05    | 1.169446667 |
| TFAP2C          | 5.2135      | 6.669372222 | 0.042703281 | 1.455872222 |
| TGFBI           | 8.991106667 | 10.39899222 | 0.003983774 | 1.407885556 |
| TOP2A           | 5.22348     | 6.724165556 | 0.009872035 | 1.500685556 |
| TYMS            | 6.003066667 | 7.551388889 | 0.034059866 | 1.548322222 |
| TYROBP          | 8.737553333 | 9.78986     | 0.00747327  | 1.052306667 |
| WIF1            | 5.266313333 | 7.615372222 | 0.007962095 | 2.349058889 |
| XG              | 6.00675     | 7.939318889 | 0.006179436 | 1.932568889 |
| ZNF663P         | 5.336316667 | 7.03356     | 0.003363565 | 1.697243333 |
