# Supplementary material for: Different DNA methylome, transcriptome and histological features in uterine fibroids with and without MED12 mutations
Source: PubMed Central journal article supplement (PMC9135739; doi:10.1038/s41598-022-12899-7), 2022-05-26
Supplement: 41598_2022_12899_MOESM6_ESM.pdf [file 41598_2022_12899_MOESM6_ESM.pdf]

**Different DNA methylome, transcriptome and histological features in uterine fibroids with and without MED12 mutations**

Ryo Maekawa\*, Department of Obstetrics and Gynecology, Yamaguchi University Graduate School of Medicine, Ube, 755-8505 Japan

Shun Sato, Department of Obstetrics and Gynecology, Yamaguchi University Graduate School of Medicine, Ube, 755-8505 Japan

Tetsuro Tamehisa, Department of Obstetrics and Gynecology, Yamaguchi University Graduate School of Medicine, Ube, 755-8505 Japan

Takahiro Sakai, Department of Obstetrics and Gynecology, Yamaguchi University Graduate School of Medicine, Ube, 755-8505 Japan

Takuya Kajimura, Department of Obstetrics and Gynecology, Yamaguchi University Graduate School of Medicine, Ube, 755-8505 Japan

Kotaro Sueoka, Department of Obstetrics and Gynecology, Yamaguchi University Graduate School of Medicine, Ube, 755-8505 Japan

Norihiro Sugino, Department of Obstetrics and Gynecology, Yamaguchi University Graduate School of Medicine, Ube, 755-8505 Japan

**Supplemental Table S4. Decreased 207 genes in the MED12m-negative uterine fibroids compared to the myometrium.**

| Gene symbol | Myometrium (mean log <sub>2</sub> value) | MED12m-negative (mean log <sub>2</sub> value) | pvalue      | fold change (log <sub>2</sub> ) |
|-------------|------------------------------------------|-----------------------------------------------|-------------|---------------------------------|
| AASS        | 9.748826667                              | 8.498497778                                   | 0.000132049 | -1.250328889                    |
| ABCA10      | 7.340423333                              | 4.554222222                                   | 0.026809795 | -2.786201111                    |
| ABCA5       | 7.754806667                              | 6.057642222                                   | 7.67E-06    | -1.697164444                    |
| ABCA6       | 8.034093333                              | 5.746515556                                   | 0.000116427 | -2.287577778                    |
| ABCA8       | 8.1599                                   | 6.024598889                                   | 0.022305602 | -2.135301111                    |
| ABCA9       | 8.429233333                              | 5.852578889                                   | 0.000651942 | -2.576654444                    |
| ABCB1       | 8.197033333                              | 7.189256667                                   | 0.017632403 | -1.007776667                    |
| ABCC4       | 7.76726                                  | 6.652903333                                   | 0.000493735 | -1.114356667                    |
| ABLM1       | 9.03055                                  | 7.562604444                                   | 2.87E-05    | -1.467945556                    |
| ACSL1       | 8.69993                                  | 7.695111111                                   | 0.02589715  | -1.004818889                    |
| ACSS3       | 9.326046667                              | 8.035497778                                   | 0.004766734 | -1.290548889                    |
| ADGRD1      | 7.95295                                  | 6.68189                                       | 0.002061602 | -1.27106                        |
| ADH1B       | 9.478346667                              | 5.788143333                                   | 0.029677593 | -3.690203333                    |
| AFAP1L2     | 7.98293                                  | 6.910837778                                   | 0.007867628 | -1.072092222                    |
| AFF3        | 8.78357                                  | 7.411196667                                   | 0.005220642 | -1.372373333                    |
| AGTR2       | 8.748006667                              | 5.801621111                                   | 9.71E-05    | -2.946385556                    |
| AKAP6       | 7.994206667                              | 6.602044444                                   | 0.000613454 | -1.392162222                    |
| ALDH1A1     | 10.19096667                              | 6.984896667                                   | 0.002783445 | -3.20607                        |
| ALDH1A2     | 8.496923333                              | 7.278153333                                   | 0.008081932 | -1.21877                        |
| ALDH1B1     | 11.06810333                              | 9.626967778                                   | 0.017594696 | -1.441135556                    |
| AMIGO2      | 9.199903333                              | 8.109792222                                   | 0.031283752 | -1.090111111                    |
| AMOTL2      | 8.40608                                  | 6.875642222                                   | 0.002987694 | -1.530437778                    |
| AOX1        | 6.86736                                  | 5.043213333                                   | 0.000906441 | -1.824146667                    |
| APOD        | 11.42763                                 | 10.05801556                                   | 0.006326432 | -1.369614444                    |
| ARAP2       | 7.295283333                              | 5.973468889                                   | 1.53E-06    | -1.321814444                    |
| ATP8B1      | 9.451416667                              | 8.346408889                                   | 0.004000788 | -1.105007778                    |
| BAMBI       | 8.82291                                  | 7.706688889                                   | 0.043098458 | -1.116221111                    |
| C1R         | 9.72456                                  | 8.618787778                                   | 0.006012139 | -1.105772222                    |
| C1S         | 11.20943                                 | 9.484965556                                   | 0.000772061 | -1.724464444                    |
| C1orf198    | 10.10221                                 | 8.684046667                                   | 0.014749007 | -1.418163333                    |
| C3          | 8.41489                                  | 6.520203333                                   | 0.000358241 | -1.894686667                    |
| C7          | 10.84609333                              | 7.565051111                                   | 0.001043128 | -3.281042222                    |
| CCDC3       | 8.90116                                  | 7.52184                                       | 0.000329638 | -1.37932                        |
| CCDC80      | 12.46395667                              | 11.42876222                                   | 0.003140985 | -1.035194444                    |
| CD44        | 12.349                                   | 11.33142222                                   | 0.033581124 | -1.017577778                    |
| CITED2      | 10.00416                                 | 8.843867778                                   | 0.001682688 | -1.160292222                    |
| CLSTN2      | 8.738923333                              | 7.26077                                       | 0.032134486 | -1.478153333                    |
| CMKLR1      | 8.30859                                  | 7.219317778                                   | 0.022617854 | -1.089272222                    |
| CNTN1       | 8.566746667                              | 6.50303                                       | 1.51E-05    | -2.063716667                    |
| COL14A1     | 10.77778333                              | 9.529687778                                   | 0.001097547 | -1.248095556                    |
| CPEB2       | 9.627703333                              | 7.908711111                                   | 0.000584052 | -1.718992222                    |
| CPED1       | 10.13617                                 | 8.253556667                                   | 0.000785487 | -1.882613333                    |
| CPXM2       | 7.462683333                              | 6.228508889                                   | 0.00314116  | -1.234174444                    |
| CTGF        | 10.10648                                 | 8.488077778                                   | 0.000898827 | -1.618402222                    |
| CTTNBP2     | 8.739303333                              | 7.429447778                                   | 0.022500159 | -1.309855556                    |
| CYR61       | 10.80813333                              | 8.732036667                                   | 1.40E-05    | -2.076096667                    |
| DAPK1       | 8.527336667                              | 7.447178889                                   | 0.023323536 | -1.080157778                    |
| DCN         | 12.50683667                              | 11.22622333                                   | 0.001512539 | -1.280613333                    |
| DDAH1       | 9.504063333                              | 8.49092                                       | 0.013341036 | -1.013143333                    |
| DFNA5       | 7.320933333                              | 6.28251                                       | 0.004183233 | -1.038423333                    |
| DGKH        | 9.116733333                              | 7.818597778                                   | 0.001567056 | -1.298135556                    |
| DNAJB5      | 10.23268667                              | 9.029805556                                   | 0.026462018 | -1.202881111                    |
| DOCK5       | 7.496656667                              | 6.366467778                                   | 1.12E-05    | -1.130188889                    |
| DPT         | 8.754213333                              | 6.553092222                                   | 7.55E-05    | -2.201121111                    |
| DUSP1       | 12.37307                                 | 10.67743333                                   | 0.000342419 | -1.695636667                    |
| EBF1        | 9.965006667                              | 8.278587778                                   | 7.90E-06    | -1.686418889                    |
| ECM2        | 8.681086667                              | 7.46916                                       | 0.002202375 | -1.211926667                    |
| EDIL3       | 10.46289333                              | 9.00105                                       | 0.008257024 | -1.461843333                    |
| EDNRB       | 9.055143333                              | 7.84054                                       | 0.00241874  | -1.214603333                    |

|              |              |              |             |              |
|--------------|--------------|--------------|-------------|--------------|
| EFEMP1       | 9.615313333  | 7.132602222  | 1.47E-05    | -2.482711111 |
| EGFR         | 8.461296667  | 7.055672222  | 0.001037095 | -1.405624444 |
| ELOVL7       | 7.551056667  | 6.402684444  | 0.003099401 | -1.148372222 |
| ENPEP        | 10.344433333 | 9.131013333  | 0.012558354 | -1.21342     |
| EPB41L2      | 9.636013333  | 8.425304444  | 1.96E-06    | -1.210708889 |
| EPHA3        | 8.78201      | 7.493571111  | 0.007742066 | -1.288438889 |
| FAM160A1     | 6.875613333  | 5.668081111  | 0.026578541 | -1.207532222 |
| FAM189A2     | 7.89901      | 6.189863333  | 3.29E-05    | -1.709146667 |
| FBLN1        | 9.9259       | 8.752152222  | 0.029371035 | -1.173747778 |
| FBLN5        | 10.956943333 | 9.855872222  | 0.005537197 | -1.101071111 |
| FGL2         | 9.41001      | 8.405415556  | 0.005569997 | -1.004594444 |
| FHL5         | 9.108466667  | 7.601053333  | 0.003184707 | -1.507413333 |
| FIGN         | 7.309243333  | 5.966118889  | 1.77E-05    | -1.343124444 |
| FLJ42393     | 8.218886667  | 6.408244444  | 0.000250754 | -1.810642222 |
| FMO2         | 7.061023333  | 5.133446667  | 0.000196833 | -1.927576667 |
| FOXP2        | 8.660763333  | 6.68976      | 0.029728963 | -1.971003333 |
| FRZB         | 9.703836667  | 8.612416667  | 0.011852363 | -1.09142     |
| GLI3         | 9.33667      | 8.102321111  | 0.003719229 | -1.234348889 |
| GPC4         | 7.983066667  | 6.674431111  | 0.006625227 | -1.308635556 |
| GPM6A        | 7.34808      | 6.078437778  | 3.39E-05    | -1.269642222 |
| GPNMB        | 11.10768     | 9.698975556  | 0.038499314 | -1.408704444 |
| GRAMD3       | 9.16672      | 8.029064444  | 0.014297508 | -1.137655556 |
| GSTM5        | 8.850226667  | 5.658325556  | 0.029162652 | -3.191901111 |
| GUCY1A3      | 9.418113333  | 8.331468889  | 0.02794322  | -1.086644444 |
| GZMK         | 6.722366667  | 5.264433333  | 0.000207884 | -1.457933333 |
| HBEGF        | 8.74029      | 7.164017778  | 0.019090512 | -1.576272222 |
| HERC3        | 8.821906667  | 7.808505556  | 1.32E-05    | -1.013401111 |
| HEYL         | 8.528646667  | 7.27463      | 0.00569278  | -1.254016667 |
| HIVEP2       | 8.654776667  | 7.399735556  | 0.001128229 | -1.255041111 |
| HPSE2        | 7.376906667  | 6.125934444  | 0.009538076 | -1.250972222 |
| HTATIP2      | 6.761046667  | 5.317862222  | 0.042086294 | -1.443184444 |
| IFITM1       | 10.682793333 | 9.622581111  | 0.016713883 | -1.060212222 |
| IGSF10       | 6.733506667  | 5.312835556  | 0.003823403 | -1.420671111 |
| INMT         | 7.809076667  | 6.713638889  | 0.002494038 | -1.095437778 |
| INPP4B       | 8.710003333  | 7.443985556  | 0.000318069 | -1.266017778 |
| ITGA11       | 10.12378     | 8.907702222  | 0.03160652  | -1.216077778 |
| ITGA6        | 10.422913333 | 9.231872222  | 0.010255903 | -1.191041111 |
| KIF21A       | 8.036183333  | 6.897333333  | 0.013351427 | -1.13885     |
| KLF4         | 8.432523333  | 6.933992222  | 0.000779189 | -1.498531111 |
| KRT19        | 7.85503      | 6.413957778  | 0.037247762 | -1.441072222 |
| LGR4         | 9.009346667  | 7.866466667  | 0.002264441 | -1.14288     |
| LIFR         | 11.14448667  | 9.591141111  | 9.23E-05    | -1.553345556 |
| LINC00260    | 7.804546667  | 6.18547      | 0.004653515 | -1.619076667 |
| LOC100130428 | 7.141806667  | 6.139781111  | 0.009479891 | -1.002025556 |
| LOC100130876 | 9.45444      | 7.625677778  | 0.040382196 | -1.828762222 |
| LOC100131541 | 6.88243      | 5.610717778  | 0.003527803 | -1.271712222 |
| LOC100133299 | 7.78315      | 6.631448889  | 0.000278853 | -1.151701111 |
| LOC100287934 | 7.892086667  | 6.187191111  | 0.000110054 | -1.704895556 |
| LONRF2       | 10.885873333 | 9.874014444  | 0.011530548 | -1.011858889 |
| LPAR1        | 9.696726667  | 8.435901111  | 0.000216991 | -1.260825556 |
| LRRC16A      | 8.0481       | 6.881626667  | 0.016254843 | -1.166473333 |
| LRRFIP1      | 11.15722     | 9.917346667  | 0.012575029 | -1.239873333 |
| LTBP1        | 10.64839     | 9.378725556  | 3.03E-05    | -1.269664444 |
| LUM          | 11.71373     | 10.561003333 | 0.039303678 | -1.152726667 |
| LY6G5B       | 8.959383333  | 7.360584444  | 0.009997789 | -1.598798889 |
| MAP3K8       | 8.43389      | 7.176256667  | 0.046094917 | -1.257633333 |
| MEOX2        | 7.841953333  | 6.772162222  | 0.031401754 | -1.069791111 |
| MIR186       | 6.65969      | 5.266391111  | 0.000373931 | -1.393298889 |
| MIR218-1     | 7.101053333  | 5.720876667  | 0.000171761 | -1.380176667 |
| NDRG1        | 10.24195667  | 9.211838889  | 0.010500729 | -1.030117778 |
| NEGR1        | 8.516783333  | 6.315065556  | 1.49E-05    | -2.201717778 |

|          |             |             |             |              |
|----------|-------------|-------------|-------------|--------------|
| NFIA     | 10.45742667 | 9.405158889 | 0.00143187  | -1.052267778 |
| NFIB     | 11.30307    | 10.20489444 | 0.001277817 | -1.098175556 |
| NR4A1    | 9.57817     | 7.878101111 | 0.032627059 | -1.700068889 |
| NT5DC3   | 9.51782     | 8.319572222 | 0.029518728 | -1.198247778 |
| OLFML1   | 9.096043333 | 6.76877     | 3.88E-05    | -2.327273333 |
| OMD      | 9.024366667 | 6.913476667 | 0.000455821 | -2.11089     |
| OSBPL10  | 9.229663333 | 8.095303333 | 0.008450643 | -1.13436     |
| PAPSS2   | 8.425596667 | 7.380542222 | 0.000229115 | -1.045054444 |
| PAWR     | 9.456773333 | 8.341748889 | 0.007410991 | -1.115024444 |
| PCOLCE   | 8.863696667 | 7.57919     | 0.007675389 | -1.284506667 |
| PDE3A    | 9.004066667 | 7.902612222 | 0.001753769 | -1.101454444 |
| PDE5A    | 9.557693333 | 8.187027778 | 0.014994714 | -1.370665556 |
| PDGFRA   | 10.59073    | 9.226125556 | 0.026211528 | -1.364604444 |
| PKD2     | 11.24644333 | 10.21355222 | 4.35E-07    | -1.032891111 |
| PLA2R1   | 9.14131     | 7.888062222 | 0.012713897 | -1.253247778 |
| PLAT     | 9.71353     | 8.587435556 | 0.002007018 | -1.126094444 |
| PLBD1    | 8.25081     | 7.053526667 | 0.000298857 | -1.197283333 |
| PLCB4    | 8.51734     | 7.05956     | 0.000206568 | -1.45778     |
| PLCE1    | 9.55058     | 7.950046667 | 0.00095946  | -1.600533333 |
| PLEKHH2  | 10.03808667 | 8.802965556 | 0.000526076 | -1.235121111 |
| PLTP     | 9.86619     | 8.790262222 | 0.002103441 | -1.075927778 |
| PODN     | 9.105926667 | 8.074173333 | 0.018887765 | -1.031753333 |
| PPM1K    | 9.096873333 | 7.825687778 | 0.047935233 | -1.271185556 |
| PPP2R2C  | 7.871763333 | 6.637963333 | 0.003202389 | -1.2338      |
| PRELP    | 10.47603667 | 9.24461     | 0.03400747  | -1.231426667 |
| PRICKLE1 | 9.418966667 | 7.897606667 | 0.000270236 | -1.52136     |
| PRKAA2   | 7.94503     | 6.930364444 | 0.015356246 | -1.014665556 |
| PRRX1    | 10.48800667 | 9.211337778 | 0.000252542 | -1.276668889 |
| RAPGEF4  | 8.307466667 | 7.223794444 | 2.70E-05    | -1.083672222 |
| RASSF2   | 10.31548667 | 8.994604444 | 0.01639374  | -1.320882222 |
| RASSF9   | 7.86323     | 6.667593333 | 0.003182623 | -1.195636667 |
| RBP1     | 7.9855      | 6.736013333 | 0.014266285 | -1.249486667 |
| RCAN2    | 8.935136667 | 7.74768     | 2.47E-05    | -1.187456667 |
| RERGL    | 6.793236667 | 5.518698889 | 0.018780144 | -1.274537778 |
| RND3     | 10.30471333 | 9.278045556 | 0.005794858 | -1.026667778 |
| RNF180   | 8.979106667 | 7.604663333 | 8.61E-05    | -1.374443333 |
| RORA     | 8.60054     | 7.413663333 | 2.38E-06    | -1.186876667 |
| RSPO1    | 9.43872     | 7.67632     | 0.003530381 | -1.7624      |
| RYR3     | 8.2539      | 7.229912222 | 0.026986942 | -1.023987778 |
| SCN7A    | 9.34427     | 6.258091111 | 0.000190584 | -3.086178889 |
| SELP     | 8.126846667 | 6.891762222 | 7.92E-05    | -1.235084444 |
| SEMA3D   | 7.526783333 | 6.287042222 | 0.004720837 | -1.239741111 |
| SERPING1 | 11.22260333 | 10.11026889 | 0.004211177 | -1.112334444 |
| SFT2D2   | 9.269486667 | 8.180681111 | 0.008894854 | -1.088805556 |
| SHTN1    | 8.097226667 | 7.086937778 | 6.93E-07    | -1.010288889 |
| SLC16A4  | 6.84775     | 5.559501111 | 0.0002877   | -1.288248889 |
| SLC25A27 | 8.232906667 | 7.137058889 | 0.022886825 | -1.095847778 |
| SLC37A3  | 10.05817333 | 8.743185556 | 0.000731698 | -1.314987778 |
| SLC6A16  | 6.773103333 | 5.735912222 | 0.004347301 | -1.037191111 |
| SLC7A2   | 8.707266667 | 7.51631     | 0.022947665 | -1.190956667 |
| SLCO2A1  | 9.587043333 | 8.107962222 | 0.002822897 | -1.479081111 |
| SLFN11   | 8.294676667 | 7.173256667 | 9.73E-06    | -1.12142     |
| SLIT2    | 10.37347    | 8.870693333 | 0.007433838 | -1.502776667 |
| SLITRK3  | 7.09005     | 5.431002222 | 0.034404355 | -1.659047778 |
| SMOC2    | 10.53375333 | 9.102764444 | 0.021972728 | -1.430988889 |
| SNCA     | 9.140423333 | 7.893168889 | 0.048976498 | -1.247254444 |
| SND1-IT1 | 7.07089     | 5.504001111 | 0.002106572 | -1.566888889 |
| SNRPA1   | 7.281813333 | 6.040822222 | 0.000103014 | -1.240991111 |
| SORBS2   | 7.92815     | 6.893941111 | 0.002147877 | -1.034208889 |
| SPON1    | 10.00346667 | 8.102867778 | 0.001468981 | -1.900598889 |
| SRPX     | 9.371483333 | 8.047292222 | 0.035516285 | -1.324191111 |

|         |             |             |             |              |
|---------|-------------|-------------|-------------|--------------|
| STARD9  | 7.830563333 | 6.606735556 | 0.002670367 | -1.223827778 |
| STEAP2  | 8.041236667 | 6.626337778 | 1.06E-05    | -1.414898889 |
| STEAP4  | 9.346616667 | 7.242648889 | 0.01583579  | -2.103967778 |
| SVEP1   | 9.305393333 | 7.27238     | 0.000134905 | -2.033013333 |
| SYDE2   | 7.991116667 | 6.926221111 | 0.008730556 | -1.064895556 |
| SYTL4   | 9.653346667 | 8.054754444 | 0.003402188 | -1.598592222 |
| TACR1   | 6.70388     | 5.653101111 | 0.00099566  | -1.050778889 |
| TAS2R20 | 6.773876667 | 5.680478889 | 0.033000116 | -1.093397778 |
| TAS2R31 | 7.078646667 | 5.862375556 | 0.008510098 | -1.216271111 |
| TCF21   | 8.091003333 | 6.412915556 | 0.001125824 | -1.678087778 |
| TENM3   | 8.205303333 | 6.956973333 | 0.019408642 | -1.24833     |
| TFPI    | 8.6311      | 7.58293     | 0.005551188 | -1.04817     |
| THBD    | 8.354823333 | 7.284455556 | 0.004521404 | -1.070367778 |
| TMEM109 | 10.10218667 | 9.079675556 | 0.005472318 | -1.022511111 |
| TMEM26  | 7.271173333 | 6.16002     | 0.028884439 | -1.111153333 |
| TNXB    | 9.174756667 | 7.370361111 | 1.91E-05    | -1.804395556 |
| TSPAN7  | 10.44686    | 9.156041111 | 4.69E-05    | -1.290818889 |
| TLL7    | 8.6943      | 7.166854444 | 0.000962706 | -1.527445556 |
| WEE1    | 9.66709     | 7.805838889 | 0.000623577 | -1.861251111 |
| WT1     | 10.10830333 | 9.030531111 | 0.039505784 | -1.077772222 |
| ZEB2    | 10.57323667 | 9.461408889 | 0.000304216 | -1.111827778 |
| ZFHX4   | 8.06592     | 6.567295556 | 0.004396215 | -1.498624444 |
| ZFPM2   | 9.931136667 | 8.174546667 | 0.00035081  | -1.75659     |
| ZNF204P | 6.952393333 | 5.499644444 | 0.00293785  | -1.452748889 |
| ZNF676  | 8.7006      | 7.044083333 | 0.003749358 | -1.656516667 |
| ZNF860  | 6.751863333 | 5.646107778 | 0.000601986 | -1.105755556 |

---
