# Supplementary material for: Different DNA methylome, transcriptome and histological features in uterine fibroids with and without MED12 mutations
Source: PubMed Central journal article supplement (PMC9135739; doi:10.1038/s41598-022-12899-7), 2022-05-26
Supplement: 41598_2022_12899_MOESM7_ESM.pdf [file 41598_2022_12899_MOESM7_ESM.pdf]

**Different DNA methylome, transcriptome and histological features in uterine fibroids with and without MED12 mutations**

Ryo Maekawa\*, Department of Obstetrics and Gynecology, Yamaguchi University Graduate School of Medicine, Ube, 755-8505 Japan

Shun Sato, Department of Obstetrics and Gynecology, Yamaguchi University Graduate School of Medicine, Ube, 755-8505 Japan

Tetsuro Tamehisa, Department of Obstetrics and Gynecology, Yamaguchi University Graduate School of Medicine, Ube, 755-8505 Japan

Takahiro Sakai, Department of Obstetrics and Gynecology, Yamaguchi University Graduate School of Medicine, Ube, 755-8505 Japan

Takuya Kajimura, Department of Obstetrics and Gynecology, Yamaguchi University Graduate School of Medicine, Ube, 755-8505 Japan

Kotaro Sueoka, Department of Obstetrics and Gynecology, Yamaguchi University Graduate School of Medicine, Ube, 755-8505 Japan

Norihiro Sugino, Department of Obstetrics and Gynecology, Yamaguchi University Graduate School of Medicine, Ube, 755-8505 Japan

Supplemental Table S5. GO analysis with the genes whose promoters are differentially methylated between the MED12m-positive and -negative uterine fibroids.

| DNA methylation status             | Gene count | Gene name                                                                                                                                                                                                                                                                                                                                                                                                                               | GO enrichment analysis (p<0.05) |
|------------------------------------|------------|-----------------------------------------------------------------------------------------------------------------------------------------------------------------------------------------------------------------------------------------------------------------------------------------------------------------------------------------------------------------------------------------------------------------------------------------|---------------------------------|
| hypermethylated in MED12m-positive | 25         | DEF6 PF4 PLCE1 FLI1 SLC8A1 NAALAD2 FOXF2 PDGFRA SLC15A2 PRKCZ KCNA4 TLX1NB PCDHB7<br>PAPPA2 LOC654433 TUBGCP3 GIMAP2 PARP12 CNGA3 AMPD2 ITGBL1 OCIAD2 GRHL3 ZNF283 NUAK1                                                                                                                                                                                                                                                                | No significant GO terms         |
| hypomethylated in MED12m-positive  | 73         | ARHGEF4 LRRC2 MIR23B C9orf3 MIR27B MAFB FAM123C LEPREL1 CRYM GABRR1 NCF2 NFKBIL1<br>MYH11 NPAS4 NT5DC3 MIR24-1 C1QL1 GNG7 HOPX SPSB1 MGAT5B TRAF3IP2 EP400 RSPH6A FYN<br>ANKRD11 SERPINA6 OTX1 KIAA0182 PLA1A TRIM26 CPLX2 BTBD2 ELFN1 ITFG2 SH3BP4 COL6A3<br>NCEH1 NNMT BEST1 SYCN LOC387646 MIR592 ZNF536 C6orf115 OSBPL8 ATP8B1 SPESP1 NOX5 STAT3<br>FCHO2 IGFN1 EFN2 MIR874 HRNBP3 SOCS2 MEF2D EXPH5 LGALS7 CDH6 ELF1 MICAL2 ANKFY1 | GO:0030154~cell differentiation |
