# Supplementary material for: Different DNA methylome, transcriptome and histological features in uterine fibroids with and without MED12 mutations
Source: PubMed Central journal article supplement (PMC9135739; doi:10.1038/s41598-022-12899-7), 2022-05-26
Supplement: 41598_2022_12899_MOESM8_ESM.pdf [file 41598_2022_12899_MOESM8_ESM.pdf]

**Different DNA methylome, transcriptome and histological features in uterine fibroids with and without MED12 mutations**

Ryo Maekawa\*, Department of Obstetrics and Gynecology, Yamaguchi University Graduate School of Medicine, Ube, 755-8505 Japan

Shun Sato, Department of Obstetrics and Gynecology, Yamaguchi University Graduate School of Medicine, Ube, 755-8505 Japan

Tetsuro Tamehisa, Department of Obstetrics and Gynecology, Yamaguchi University Graduate School of Medicine, Ube, 755-8505 Japan

Takahiro Sakai, Department of Obstetrics and Gynecology, Yamaguchi University Graduate School of Medicine, Ube, 755-8505 Japan

Takuya Kajimura, Department of Obstetrics and Gynecology, Yamaguchi University Graduate School of Medicine, Ube, 755-8505 Japan

Kotaro Sueoka, Department of Obstetrics and Gynecology, Yamaguchi University Graduate School of Medicine, Ube, 755-8505 Japan

Norihiro Sugino, Department of Obstetrics and Gynecology, Yamaguchi University Graduate School of Medicine, Ube, 755-8505 Japan

Supplemental Table S6. GO analysis with the genes whose promoters are differentially methylated among the subtypes of MED12m-negative uterine fibroids.

| DNA methylation status                             | Gene count | Gene name                                                                                                                                                                                                  | GO enrichment analysis (p<0.05) |
|----------------------------------------------------|------------|------------------------------------------------------------------------------------------------------------------------------------------------------------------------------------------------------------|---------------------------------|
| hypermethylated in subtype-1 compared to subtype-2 | 4          | PLCE1 PAPP A2 GIMAP2 AMPD2                                                                                                                                                                                 | No significant GO terms         |
| hypermethylated in subtype-1 compared to subtype-3 | 3          | PLCE1 PAPP A2 GIMAP2                                                                                                                                                                                       | No significant GO terms         |
| hypermethylated in subtype-2 compared to subtype-1 | 30         | LRRC2 MIR23B C9orf3 MIR27B CRYM GABRR1 NFKBIL1 MYH11 NPAS4 NT5DC3 MIR24-1 TRAF3IP2<br>ELFN1 COL6A3 NCEH1 BEST1 SYCN LOC387646 C6orf115 ATP8B1 STAT3 FCHO2 IGFN1 BTBD2 ELF1<br>OTX1 ANKFY1 MARCH3 PCGF3 LUM | No significant GO terms         |
| hypermethylated in subtype-2 compared to subtype-3 | 11         | MIR23B C9orf3 MIR27B NT5DC3 KCNA4 BEST1 C6orf115 HRNBP3 CNGA3 PCGF3 LUM                                                                                                                                    | No significant GO terms         |
| hypermethylated in subtype-3 compared to subtype-1 | 20         | LRRC2 LEPREL1 MIR24-1 C9orf3 SPSB1 EP400 ELFN1 COL6A3 NCEH1 NNMT ATP8B1 STAT3 FCHO2<br>IGFN1 EFNB2 SOCS2 BTBD2 MEF2D ELF1 ANKFY1                                                                           | No significant GO terms         |
| hypermethylated in subtype-3 compared to subtype-2 | 3          | NCF2 PLA1A PCDHB7                                                                                                                                                                                          | No significant GO terms         |
