# Supplementary material for: Different DNA methylome, transcriptome and histological features in uterine fibroids with and without MED12 mutations
Source: PubMed Central journal article supplement (PMC9135739; doi:10.1038/s41598-022-12899-7), 2022-05-26
Supplement: 41598_2022_12899_MOESM9_ESM.pdf [file 41598_2022_12899_MOESM9_ESM.pdf]

**Different DNA methylome, transcriptome and histological features in uterine fibroids with and without MED12 mutations**

Ryo Maekawa\*, Department of Obstetrics and Gynecology, Yamaguchi University Graduate School of Medicine, Ube, 755-8505 Japan

Shun Sato, Department of Obstetrics and Gynecology, Yamaguchi University Graduate School of Medicine, Ube, 755-8505 Japan

Tetsuro Tamehisa, Department of Obstetrics and Gynecology, Yamaguchi University Graduate School of Medicine, Ube, 755-8505 Japan

Takahiro Sakai, Department of Obstetrics and Gynecology, Yamaguchi University Graduate School of Medicine, Ube, 755-8505 Japan

Takuya Kajimura, Department of Obstetrics and Gynecology, Yamaguchi University Graduate School of Medicine, Ube, 755-8505 Japan

Kotaro Sueoka, Department of Obstetrics and Gynecology, Yamaguchi University Graduate School of Medicine, Ube, 755-8505 Japan

Norihiro Sugino, Department of Obstetrics and Gynecology, Yamaguchi University Graduate School of Medicine, Ube, 755-8505 Japan

Supplemental Table S7. GO enrichment analysis with the differently expressed genes between the subtype-1 of the MED12m-negative uterine fibroids and the myometrium.

| GO term                                                                                   | P value (p<0.05) |
|-------------------------------------------------------------------------------------------|------------------|
| Increased 171 genes                                                                       |                  |
| GO:0006396~RNA processing                                                                 | 2.55E-101        |
| GO:0002181~cytoplasmic translation                                                        | 4.05E-04         |
| GO:0006614~SRP-dependent cotranslational protein targeting to membrane                    | 4.49E-04         |
| GO:0019083~viral transcription                                                            | 0.001162729      |
| GO:0000184~nuclear-transcribed mRNA catabolic process, nonsense-mediated decay            | 0.001643678      |
| GO:0006413~translational initiation                                                       | 0.002413068      |
| GO:0006364~rRNA processing                                                                | 0.011902459      |
| GO:0006412~translation                                                                    | 0.020622951      |
| Decreased 188 genes                                                                       |                  |
| GO:0007155~cell adhesion                                                                  | 5.09E-05         |
| GO:0006954~inflammatory response                                                          | 5.14E-04         |
| GO:1902895~positive regulation of pri-miRNA transcription from RNA polymerase II promoter | 5.48E-04         |
| GO:0045429~positive regulation of nitric oxide biosynthetic process                       | 6.45E-04         |
| GO:0034097~response to cytokine                                                           | 8.75E-04         |
| GO:0007568~aging                                                                          | 9.41E-04         |
| GO:0016055~Wnt signaling pathway                                                          | 0.001557416      |
| GO:0032496~response to lipopolysaccharide                                                 | 0.001796186      |
| GO:0001525~angiogenesis                                                                   | 0.004384783      |
| GO:0098609~cell-cell adhesion                                                             | 0.005021839      |
| GO:0071277~cellular response to calcium ion                                               | 0.005998148      |
| GO:0007010~cytoskeleton organization                                                      | 0.006585854      |
| GO:0007165~signal transduction                                                            | 0.020518169      |
| GO:0007596~blood coagulation                                                              | 0.021752169      |
| GO:0008285~negative regulation of cell proliferation                                      | 0.035365282      |
| GO:0070374~positive regulation of ERK1 and ERK2 cascade                                   | 0.039652766      |
