# Supplementary material for: Different DNA methylome, transcriptome and histological features in uterine fibroids with and without MED12 mutations
Source: PubMed Central journal article supplement (PMC9135739; doi:10.1038/s41598-022-12899-7), 2022-05-26
Supplement: 41598_2022_12899_MOESM10_ESM.pdf [file 41598_2022_12899_MOESM10_ESM.pdf]

**Different DNA methylome, transcriptome and histological features in uterine fibroids with and without MED12 mutations**

Ryo Maekawa\*, Department of Obstetrics and Gynecology, Yamaguchi University Graduate School of Medicine, Ube, 755-8505 Japan

Shun Sato, Department of Obstetrics and Gynecology, Yamaguchi University Graduate School of Medicine, Ube, 755-8505 Japan

Tetsuro Tamehisa, Department of Obstetrics and Gynecology, Yamaguchi University Graduate School of Medicine, Ube, 755-8505 Japan

Takahiro Sakai, Department of Obstetrics and Gynecology, Yamaguchi University Graduate School of Medicine, Ube, 755-8505 Japan

Takuya Kajimura, Department of Obstetrics and Gynecology, Yamaguchi University Graduate School of Medicine, Ube, 755-8505 Japan

Kotaro Sueoka, Department of Obstetrics and Gynecology, Yamaguchi University Graduate School of Medicine, Ube, 755-8505 Japan

Norihiro Sugino, Department of Obstetrics and Gynecology, Yamaguchi University Graduate School of Medicine, Ube, 755-8505 Japan

Supplemental Table S8. GO enrichment analysis with the differently expressed genes between the subtype-2 of the MED12m-negative uterine fibroids and the myometrium.

| GO term                                                                              | P value (p<0.05) |
|--------------------------------------------------------------------------------------|------------------|
| Increased 283 genes                                                                  |                  |
| GO:0006396~RNA processing                                                            | 3.35E-41         |
| GO:0000184~nuclear-transcribed mRNA catabolic process, nonsense-mediated decay       | 2.65E-07         |
| GO:0002181~cytoplasmic translation                                                   | 1.31E-06         |
| GO:0006614~SRP-dependent cotranslational protein targeting to membrane               | 1.59E-06         |
| GO:0006413~translational initiation                                                  | 4.97E-06         |
| GO:0019083~viral transcription                                                       | 9.11E-06         |
| GO:0006412~translation                                                               | 4.12E-04         |
| GO:0006364~rRNA processing                                                           | 6.20E-04         |
| GO:0006355~regulation of transcription, DNA-templated                                | 0.002003548      |
| GO:0001822~kidney development                                                        | 0.004096864      |
| GO:0008584~male gonad development                                                    | 0.011024651      |
| GO:0007623~circadian rhythm                                                          | 0.014159859      |
| GO:0000398~mRNA splicing, via spliceosome                                            | 0.015455088      |
| GO:0007050~cell cycle arrest                                                         | 0.024022485      |
| GO:0008380~RNA splicing                                                              | 0.030497776      |
| Decreased 366 genes                                                                  |                  |
| GO:0030198~extracellular matrix organization                                         | 2.53E-05         |
| GO:0045766~positive regulation of angiogenesis                                       | 6.82E-05         |
| GO:0001523~retinoid metabolic process                                                | 7.95E-05         |
| GO:0070373~negative regulation of ERK1 and ERK2 cascade                              | 7.96E-05         |
| GO:0045600~positive regulation of fat cell differentiation                           | 1.92E-04         |
| GO:0007165~signal transduction                                                       | 3.13E-04         |
| GO:0042059~negative regulation of epidermal growth factor receptor signaling pathway | 3.15E-04         |
| GO:1900026~positive regulation of substrate adhesion-dependent cell spreading        | 6.42E-04         |
| GO:0006954~inflammatory response                                                     | 9.95E-04         |
| GO:0002576~platelet degranulation                                                    | 0.001022669      |
| GO:0098609~cell-cell adhesion                                                        | 0.001186118      |
| GO:0042572~retinol metabolic process                                                 | 0.001539173      |
| GO:0007155~cell adhesion                                                             | 0.001816217      |
| GO:0048662~negative regulation of smooth muscle cell proliferation                   | 0.002423937      |
| GO:0035556~intracellular signal transduction                                         | 0.002680805      |
| GO:0010811~positive regulation of cell-substrate adhesion                            | 0.003289171      |
| GO:0030335~positive regulation of cell migration                                     | 0.003482585      |
| GO:0060021~palate development                                                        | 0.004401246      |
| GO:0043627~response to estrogen                                                      | 0.005321001      |
| GO:0071364~cellular response to epidermal growth factor stimulus                     | 0.007090592      |
| GO:0001938~positive regulation of endothelial cell proliferation                     | 0.007143175      |
| GO:0042493~response to drug                                                          | 0.007421376      |
| GO:0007160~cell-matrix adhesion                                                      | 0.007775914      |
| GO:0006936~muscle contraction                                                        | 0.008492016      |
| GO:0032355~response to estradiol                                                     | 0.010064133      |
| GO:0006986~response to unfolded protein                                              | 0.012256185      |
| GO:0051496~positive regulation of stress fiber assembly                              | 0.012256185      |
| GO:0030336~negative regulation of cell migration                                     | 0.014102931      |
| GO:0042127~regulation of cell proliferation                                          | 0.016004853      |
| GO:0022900~electron transport chain                                                  | 0.01645628       |
| GO:0051592~response to calcium ion                                                   | 0.017391532      |
| GO:0008285~negative regulation of cell proliferation                                 | 0.018154295      |
| GO:0001525~angiogenesis                                                              | 0.020169195      |
| GO:0006629~lipid metabolic process                                                   | 0.020838166      |
| GO:0010595~positive regulation of endothelial cell migration                         | 0.022561155      |
| GO:0046718~viral entry into host cell                                                | 0.022906344      |
| GO:0016477~cell migration                                                            | 0.025854552      |
| GO:0006805~xenobiotic metabolic process                                              | 0.027609236      |
| GO:0030036~actin cytoskeleton organization                                           | 0.028160418      |
| GO:0007166~cell surface receptor signaling pathway                                   | 0.029613318      |
| GO:0008217~regulation of blood pressure                                              | 0.03122256       |
| GO:0007229~integrin-mediated signaling pathway                                       | 0.032884727      |
| GO:0008360~regulation of cell shape                                                  | 0.038359495      |
| GO:0051897~positive regulation of protein kinase B signaling                         | 0.03974895       |
