# Supplementary material for: Different DNA methylome, transcriptome and histological features in uterine fibroids with and without MED12 mutations
Source: PubMed Central journal article supplement (PMC9135739; doi:10.1038/s41598-022-12899-7), 2022-05-26
Supplement: 41598_2022_12899_MOESM11_ESM.pdf [file 41598_2022_12899_MOESM11_ESM.pdf]

**Different DNA methylome, transcriptome and histological features in uterine fibroids with and without MED12 mutations**

Ryo Maekawa\*, Department of Obstetrics and Gynecology, Yamaguchi University Graduate School of Medicine, Ube, 755-8505 Japan

Shun Sato, Department of Obstetrics and Gynecology, Yamaguchi University Graduate School of Medicine, Ube, 755-8505 Japan

Tetsuro Tamehisa, Department of Obstetrics and Gynecology, Yamaguchi University Graduate School of Medicine, Ube, 755-8505 Japan

Takahiro Sakai, Department of Obstetrics and Gynecology, Yamaguchi University Graduate School of Medicine, Ube, 755-8505 Japan

Takuya Kajimura, Department of Obstetrics and Gynecology, Yamaguchi University Graduate School of Medicine, Ube, 755-8505 Japan

Kotaro Sueoka, Department of Obstetrics and Gynecology, Yamaguchi University Graduate School of Medicine, Ube, 755-8505 Japan

Norihiro Sugino, Department of Obstetrics and Gynecology, Yamaguchi University Graduate School of Medicine, Ube, 755-8505 Japan

Supplemental Table S9. GO enrichment analysis with the differently expressed genes between the subtype-3 of the MED12m-negative uterine fibroids and the myometrium.

| GO term                                                                         | P value (p<0.05) |
|---------------------------------------------------------------------------------|------------------|
| Increased 96 genes                                                              |                  |
| GO:0006396~RNA processing                                                       | 2.20E-27         |
| GO:0006412~translation                                                          | 0.012232755      |
| Decreased 129 genes                                                             |                  |
| GO:0042572~retinol metabolic process                                            | 1.09E-05         |
| GO:0001523~retinoid metabolic process                                           | 3.03E-05         |
| GO:0070373~negative regulation of ERK1 and ERK2 cascade                         | 0.001419186      |
| GO:0006954~inflammatory response                                                | 0.002014036      |
| GO:0006869~lipid transport                                                      | 0.002292833      |
| GO:0045944~positive regulation of transcription from RNA polymerase II promoter | 0.002916542      |
| GO:0098609~cell-cell adhesion                                                   | 0.004540914      |
| GO:0055085~transmembrane transport                                              | 0.00798687       |
| GO:0032496~response to lipopolysaccharide                                       | 0.011509115      |
| GO:0030336~negative regulation of cell migration                                | 0.011761895      |
| GO:0007155~cell adhesion                                                        | 0.012698665      |
| GO:0007165~signal transduction                                                  | 0.03841679       |
| GO:0007275~multicellular organism development                                   | 0.039038578      |
