# Supplementary material for: Different DNA methylome, transcriptome and histological features in uterine fibroids with and without MED12 mutations
Source: PubMed Central journal article supplement (PMC9135739; doi:10.1038/s41598-022-12899-7), 2022-05-26
Supplement: 41598_2022_12899_MOESM12_ESM.pdf [file 41598_2022_12899_MOESM12_ESM.pdf]

**Different DNA methylome, transcriptome and histological features in uterine fibroids with and without MED12 mutations**

Ryo Maekawa\*, Department of Obstetrics and Gynecology, Yamaguchi University Graduate School of Medicine, Ube, 755-8505 Japan

Shun Sato, Department of Obstetrics and Gynecology, Yamaguchi University Graduate School of Medicine, Ube, 755-8505 Japan

Tetsuro Tamehisa, Department of Obstetrics and Gynecology, Yamaguchi University Graduate School of Medicine, Ube, 755-8505 Japan

Takahiro Sakai, Department of Obstetrics and Gynecology, Yamaguchi University Graduate School of Medicine, Ube, 755-8505 Japan

Takuya Kajimura, Department of Obstetrics and Gynecology, Yamaguchi University Graduate School of Medicine, Ube, 755-8505 Japan

Kotaro Sueoka, Department of Obstetrics and Gynecology, Yamaguchi University Graduate School of Medicine, Ube, 755-8505 Japan

Norihiro Sugino, Department of Obstetrics and Gynecology, Yamaguchi University Graduate School of Medicine, Ube, 755-8505 Japan

Supplemental Table S10. Increased DNA methylation and mRNA expression levels of SATB2 or NRG1 in uterine fibroids with and without MED12 mutations.

|                                                                        | MED12m-positive uterine fibroids (n = 9) | MED12m-negative uterine fibroids (n = 12) | Total         |
|------------------------------------------------------------------------|------------------------------------------|-------------------------------------------|---------------|
| DNA methylation (15% or more DNA methylation level than myometrium)    |                                          |                                           |               |
| SATB2                                                                  | 88.9% (8/9)                              | 75% (9/12)                                | 81% (17/21)   |
| NRG1                                                                   | 100% (9/9)                               | 75% (9/12)                                | 85.7% (18/21) |
| mRNA expression (2-fold or more mRNA expression level than myometrium) |                                          |                                           |               |
| SATB2                                                                  | 100% (9/9)                               | 75% (9/12)                                | 85.7% (18/21) |
| NRG1                                                                   | 100% (9/9)                               | 66.7% (8/12)                              | 81.0% (17/21) |
