# Supplementary material for: Different DNA methylome, transcriptome and histological features in uterine fibroids with and without MED12 mutations
Source: PubMed Central journal article supplement (PMC9135739; doi:10.1038/s41598-022-12899-7), 2022-05-26
Supplement: 41598_2022_12899_MOESM13_ESM.pdf [file 41598_2022_12899_MOESM13_ESM.pdf]

**Different DNA methylome, transcriptome and histological features in uterine fibroids with and without MED12 mutations**

Ryo Maekawa\*, Department of Obstetrics and Gynecology, Yamaguchi University Graduate School of Medicine, Ube, 755-8505 Japan

Shun Sato, Department of Obstetrics and Gynecology, Yamaguchi University Graduate School of Medicine, Ube, 755-8505 Japan

Tetsuro Tamehisa, Department of Obstetrics and Gynecology, Yamaguchi University Graduate School of Medicine, Ube, 755-8505 Japan

Takahiro Sakai, Department of Obstetrics and Gynecology, Yamaguchi University Graduate School of Medicine, Ube, 755-8505 Japan

Takuya Kajimura, Department of Obstetrics and Gynecology, Yamaguchi University Graduate School of Medicine, Ube, 755-8505 Japan

Kotaro Sueoka, Department of Obstetrics and Gynecology, Yamaguchi University Graduate School of Medicine, Ube, 755-8505 Japan

Norihiro Sugino, Department of Obstetrics and Gynecology, Yamaguchi University Graduate School of Medicine, Ube, 755-8505 Japan

Supplemental Table S11. PCR primers for combined bisulfite restriction analysis (COBRA) and quantitative real-time RT-PCR (qRT-PCR)

| Gene name | Usage            | Amplified region (UCSC hg19)  | PCR primers                                                         | Product size (bp) | # of CpGs | Restriction enzyme<br>Fragment size (bp) |
|-----------|------------------|-------------------------------|---------------------------------------------------------------------|-------------------|-----------|------------------------------------------|
| SATB2     | COBRA            | chr2: 200,330,754-200,331,048 | F: TTAGAAAAGTGGTGGGTTTTTTTAGTT<br>R: TACACCCACAACCTCAAATTCTACTATCC  | 295               | 9         | <i>Hpy</i> CH4IV<br>148 / 147            |
| NRG1      | COBRA            | chr8: 32,503,979-32,504,264   | F: TGTTGTTGAAAAGTTTATTTTTTTAGGGAG<br>R: ACATCAATTAACCTAATCCCCATAACC | 286               | 3         | <i>Taq</i> I<br>132 / 154                |
| SATB2     | real-time RT-PCR | chr2: 200,193,607-200,213,649 | F: GATAAACCAACAGATTGCCGTTAG<br>R: CTTACGCAGAATCTCAGACAACAAT         | 253               | -         | -                                        |
| NRG1      | real-time RT-PCR | chr8: 32,453,412-32,463,168   | F: GTGTGAAACCAGTTCTGAATACTCC                                        | 200               | -         | -                                        |
